# Supplementary material for: Circulating Insulin-Like Growth Factor 1 Levels and Migraine Risk: A Mendelian Randomization Study
Source: Springer Nature journal article supplement (doi:10.1007/s40120-022-00398-w), 2022-09-01
Supplement: MOESM1 [file 23441796]

**Circulating insulin-like growth factor-1 levels and migraine risk: A Mendelian randomization study**

**Reziya Abuduxukuer, MD<sup>1#</sup>; Peng-Peng Niu, MD, PhD<sup>2#</sup>; Zhen-Ni Guo, MD, PhD<sup>1,3,4\*</sup>; Yu-Ming Xu, MD, PhD<sup>2</sup>; Yi Yang, MD, PhD<sup>1,3,4\*</sup>**

<sup>1</sup> Stroke Center, Department of Neurology, the First Hospital of Jilin University, Chang Chun, China.

<sup>2</sup> Department of Neurology, The First Affiliated Hospital of Zhengzhou University, Zhengzhou, China.

<sup>3</sup> Neuroscience Research Center, the First Hospital of Jilin University, Chang Chun, China.

<sup>4</sup> Jilin Provincial Key Laboratory of Cerebrovascular Disease, Changchun, China.

# Reziya Abuduxukuer and Peng-Peng Niu contributed equally.

**\*Correspondences:**

**Yi Yang**, MD, PhD, Stroke Center, Department of Neurology, the First Hospital of Jilin University, Chang Chun, China. Telephone: +86-431-88782378; Fax: +86-431-88782378; E-mail: Primary E-mail: yang\_yi@jlu.edu.cn; Secondary E-mail: doctoryangyi@163.com.

**Zhen-Ni Guo**, MD, PhD, Stroke Center, Department of Neurology, the First Hospital of Jilin University, Chang Chun, China. E-mail: Primary E-mail: zhen1ni2@jlu.edu.cn; Secondary E-mail: [zhen1ni2@163.com](mailto:zhen1ni2@163.com).

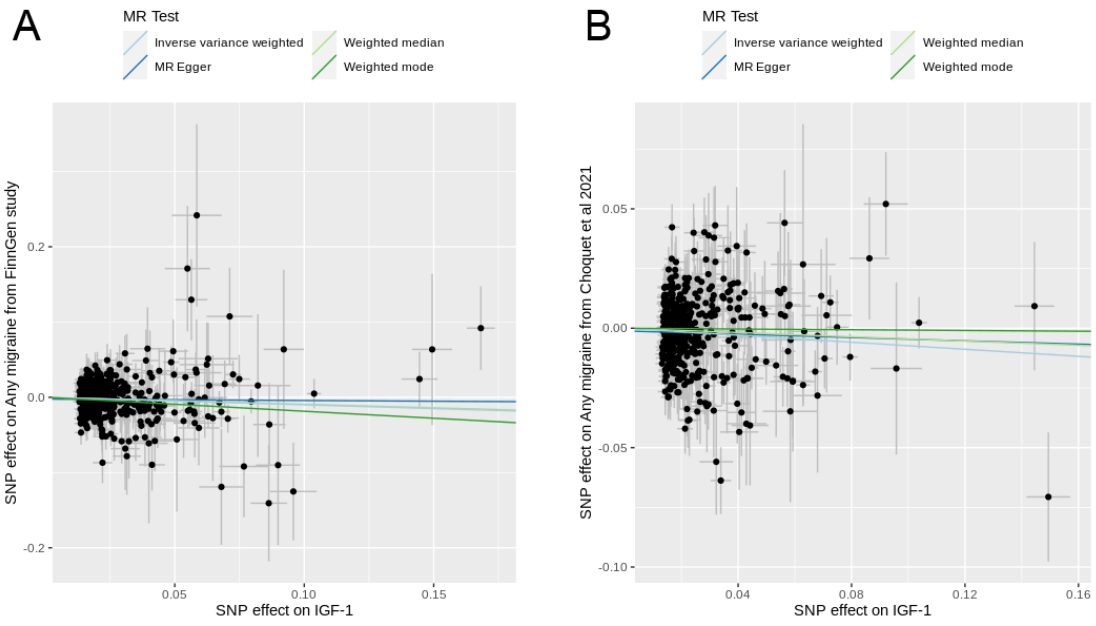

**Supplementary Figure 1 Scatter plots of SNP-exposure and SNP-outcome associations**

A: The FinnGen study; B: Choquet et al 2021.

**Abbreviations:** IGF-1, Insulin-like growth factor-1; MR, Mendelian randomization; SNP, single nucleotide polymorphism.

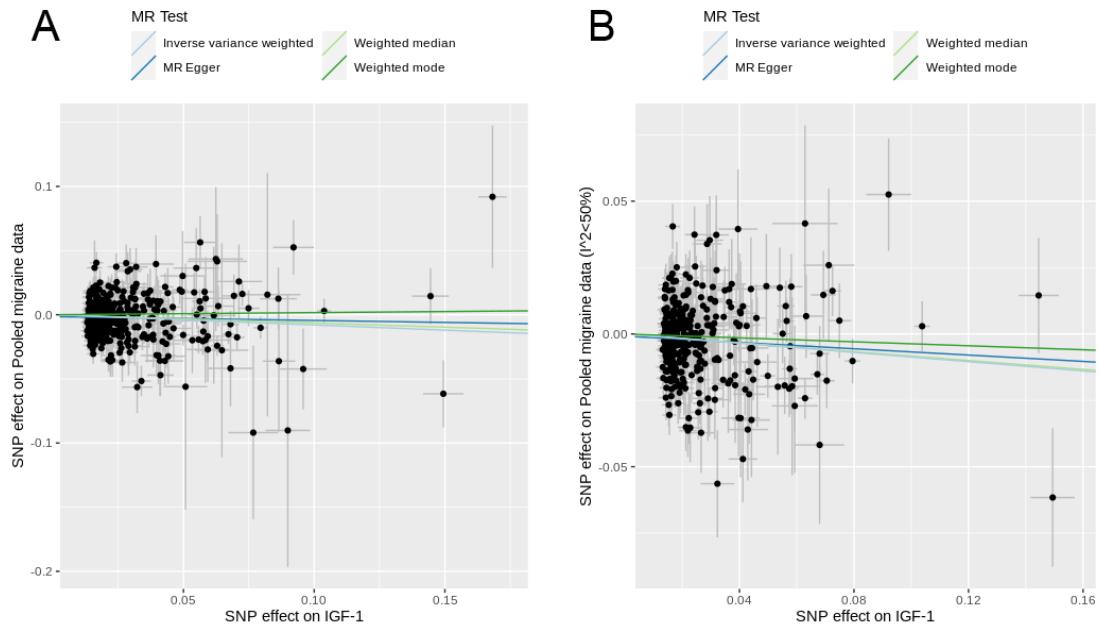

**Supplementary Figure 2 Scatter plots using pooled estimates of two migraine datasets**

A: Pooled outcome data; B: Only SNPs with no evidence of heterogeneity were included ( $I^2 < 50\%$ ).

**Abbreviations:** IGF-1, Insulin-like growth factor-1; MR, Mendelian randomization; SNP, single nucleotide polymorphism.

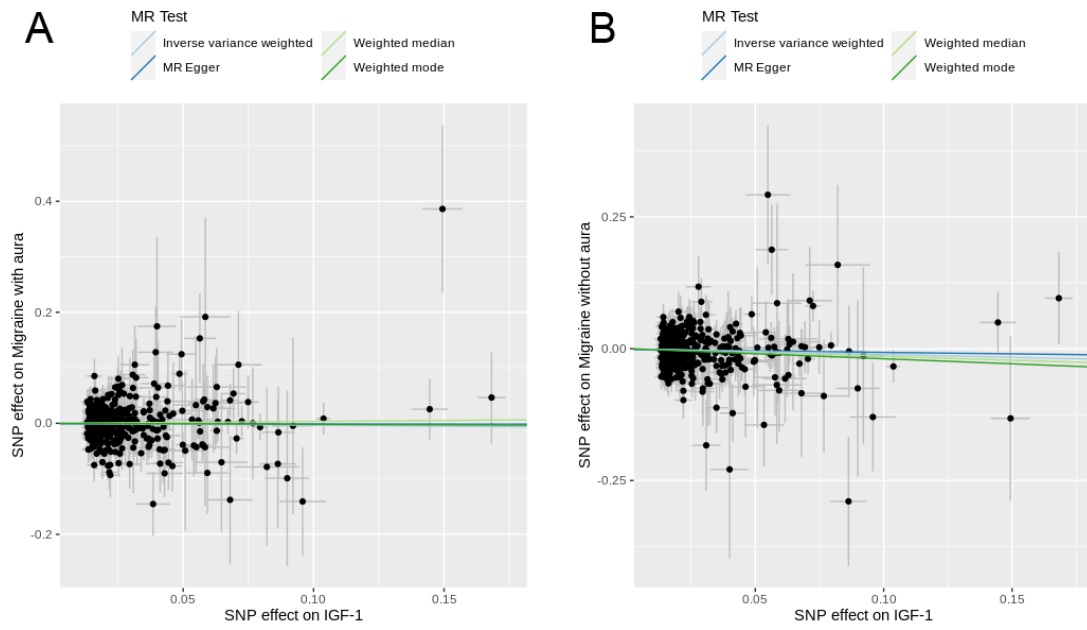

### Supplementary Figure 3 Scatter plots of migraine subtypes

A: migraine with aura; B: migraine without aura.

**Abbreviations:** IGF-1, Insulin-like growth factor-1; MR, Mendelian randomization; SNP, single nucleotide polymorphism.

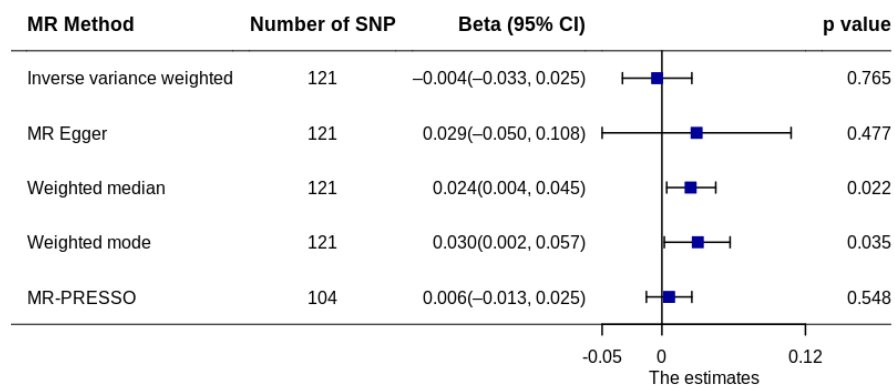

#### Supplementary Figure 4 MR analysis of migraine on IGF-1

**Abbreviations:** CI, confidence interval; IGF-1, Insulin-like growth factor-1; MR, Mendelian randomization; MR-PRESSO, MR-Pleiotropy Residual Sum and Outlier; SNP, single nucleotide polymorphism.

**Supplementary Table 1 Characteristics of candidate genetic instruments**

| SNP        | CHR | POS       | EA | OA | MAF    | Beta    | se     | p value   | VR       | F statistic |
|------------|-----|-----------|----|----|--------|---------|--------|-----------|----------|-------------|
| rs2460002  | 1   | 2119833   | G  | A  | 0.3222 | 0.0158  | 0.0026 | 9.16E-10  | 0.000109 | 36.9        |
| rs17393144 | 1   | 9210262   | A  | G  | 0.3137 | 0.0143  | 0.0026 | 3.56E-08  | 0.000088 | 30.3        |
| rs12375    | 1   | 10596341  | T  | C  | 0.3322 | 0.0168  | 0.0026 | 5.42E-11  | 0.000125 | 41.8        |
| rs17367504 | 1   | 11862778  | G  | A  | 0.1630 | -0.0205 | 0.0032 | 2.34E-10  | 0.000115 | 41.0        |
| rs76240114 | 1   | 16126026  | C  | A  | 0.1769 | 0.0197  | 0.0032 | 5.46E-10  | 0.000113 | 37.9        |
| rs1497406  | 1   | 16505320  | G  | A  | 0.4196 | -0.0188 | 0.0024 | 7.86E-15  | 0.000172 | 61.4        |
| rs4654887  | 1   | 21234923  | T  | C  | 0.3956 | 0.0163  | 0.0024 | 2.83E-11  | 0.000127 | 46.1        |
| rs3218211  | 1   | 23835794  | G  | A  | 0.4907 | -0.0145 | 0.0024 | 1.17E-09  | 0.000105 | 36.5        |
| rs17163588 | 1   | 26450009  | T  | C  | 0.1751 | 0.0306  | 0.0031 | 1.76E-22  | 0.000270 | 97.4        |
| rs74465889 | 1   | 27209439  | G  | A  | 0.1611 | -0.0343 | 0.0033 | 5.57E-26  | 0.000318 | 108.0       |
| rs556408   | 1   | 29166323  | A  | C  | 0.1421 | -0.0248 | 0.0034 | 3.43E-13  | 0.000150 | 53.2        |
| rs2294814  | 1   | 40319587  | C  | A  | 0.4540 | -0.0136 | 0.0024 | 1.65E-08  | 0.000092 | 32.1        |
| rs1740610  | 1   | 41502680  | A  | C  | 0.2207 | 0.0207  | 0.0029 | 9.98E-13  | 0.000147 | 51.0        |
| rs660899   | 1   | 44117006  | T  | G  | 0.3473 | 0.0271  | 0.0025 | 7.58E-27  | 0.000333 | 117.5       |
| rs2108202  | 1   | 44395786  | T  | C  | 0.2076 | 0.0182  | 0.0029 | 5.26E-10  | 0.000109 | 39.4        |
| rs11208557 | 1   | 65423071  | C  | T  | 0.1311 | 0.0248  | 0.0035 | 1.32E-12  | 0.000140 | 50.2        |
| rs1171265  | 1   | 66003252  | G  | A  | 0.3557 | -0.0169 | 0.0025 | 1.19E-11  | 0.000131 | 45.7        |
| rs12031253 | 1   | 68676649  | G  | A  | 0.1883 | 0.0191  | 0.0030 | 3.20E-10  | 0.000112 | 40.5        |
| rs12239520 | 1   | 91502560  | C  | T  | 0.1307 | 0.0245  | 0.0035 | 4.29E-12  | 0.000136 | 49.0        |
| rs165316   | 1   | 91533297  | G  | A  | 0.1981 | 0.0725  | 0.0030 | 2.63E-128 | 0.001670 | 584.0       |
| rs983040   | 1   | 91623097  | T  | C  | 0.2648 | 0.0210  | 0.0027 | 7.16E-15  | 0.000172 | 60.5        |
| rs10874746 | 1   | 93323971  | C  | T  | 0.3447 | -0.0176 | 0.0025 | 2.30E-12  | 0.000140 | 49.6        |
| rs599839   | 1   | 109822166 | A  | G  | 0.2283 | -0.0315 | 0.0028 | 1.04E-28  | 0.000350 | 126.6       |
| rs78844054 | 1   | 153770361 | A  | G  | 0.0501 | 0.0309  | 0.0056 | 4.40E-08  | 0.000091 | 30.4        |
| rs9427104  | 1   | 154589232 | T  | C  | 0.4788 | -0.0224 | 0.0024 | 7.18E-21  | 0.000250 | 87.1        |
| rs7535144  | 1   | 154965113 | T  | G  | 0.0289 | -0.0404 | 0.0067 | 1.44E-09  | 0.000092 | 36.4        |
| rs77369503 | 1   | 163027266 | A  | G  | 0.0332 | -0.0462 | 0.0068 | 9.08E-12  | 0.000137 | 46.2        |
| rs2072758  | 1   | 174525917 | T  | C  | 0.1097 | 0.0221  | 0.0038 | 6.74E-09  | 0.000095 | 33.8        |
| rs10913189 | 1   | 176473979 | C  | T  | 0.0643 | -0.0266 | 0.0048 | 2.28E-08  | 0.000085 | 30.7        |
| rs77281709 | 1   | 176501831 | T  | C  | 0.0484 | 0.0444  | 0.0057 | 4.96E-15  | 0.000182 | 60.7        |
| rs11806613 | 1   | 176535138 | G  | A  | 0.1593 | 0.0680  | 0.0033 | 1.32E-96  | 0.001239 | 424.6       |
| rs6425558  | 1   | 179417347 | T  | C  | 0.2129 | -0.0202 | 0.0029 | 3.54E-12  | 0.000137 | 48.5        |
| rs2298083  | 1   | 183515428 | A  | G  | 0.1254 | -0.0308 | 0.0036 | 8.46E-18  | 0.000208 | 73.2        |
| rs708725   | 1   | 205744138 | T  | G  | 0.4301 | -0.0157 | 0.0024 | 1.01E-10  | 0.000121 | 42.8        |
| rs2488249  | 1   | 208000018 | C  | T  | 0.3512 | -0.0180 | 0.0025 | 1.09E-12  | 0.000148 | 51.8        |
| rs3958509  | 1   | 208301738 | C  | T  | 0.4588 | 0.0165  | 0.0024 | 5.17E-12  | 0.000135 | 47.3        |
| rs1223801  | 1   | 214348141 | A  | G  | 0.1634 | -0.0226 | 0.0033 | 4.01E-12  | 0.000140 | 46.9        |
| rs78783655 | 1   | 220865963 | C  | T  | 0.0438 | 0.0404  | 0.0058 | 4.82E-12  | 0.000137 | 48.5        |
| rs61830291 | 1   | 221001142 | C  | A  | 0.0971 | 0.0278  | 0.0042 | 2.14E-11  | 0.000135 | 43.8        |
| rs12141189 | 1   | 221053545 | C  | T  | 0.2455 | -0.0438 | 0.0028 | 5.17E-56  | 0.000711 | 244.7       |
| rs6663896  | 1   | 221668517 | C  | T  | 0.3975 | -0.0167 | 0.0024 | 7.71E-12  | 0.000134 | 48.4        |
| rs708108   | 1   | 228189855 | C  | T  | 0.4032 | -0.0143 | 0.0024 | 4.63E-09  | 0.000098 | 35.5        |
| rs526936   | 1   | 234852204 | A  | G  | 0.4821 | 0.0233  | 0.0024 | 3.64E-22  | 0.000271 | 94.3        |
| rs2802954  | 1   | 235015126 | C  | A  | 0.2835 | -0.0170 | 0.0027 | 1.82E-10  | 0.000117 | 39.6        |
| rs9782883  | 1   | 243892532 | G  | A  | 0.1810 | -0.0327 | 0.0031 | 2.15E-26  | 0.000317 | 111.3       |
| rs12623864 | 2   | 6421045   | A  | G  | 0.4631 | 0.0150  | 0.0024 | 3.42E-10  | 0.000112 | 39.1        |
| rs13405775 | 2   | 26026986  | T  | C  | 0.3376 | 0.0364  | 0.0025 | 2.67E-47  | 0.000593 | 212.0       |
| rs28489942 | 2   | 27368588  | C  | T  | 0.3498 | 0.0182  | 0.0025 | 4.12E-13  | 0.000151 | 53.0        |
| rs1260326  | 2   | 27730940  | C  | T  | 0.3931 | 0.0629  | 0.0025 | 9.60E-145 | 0.001888 | 633.0       |
| rs6745881  | 2   | 40616451  | T  | C  | 0.3407 | -0.0139 | 0.0025 | 4.12E-08  | 0.000087 | 30.9        |
| rs222471   | 2   | 42638057  | C  | T  | 0.1309 | -0.0226 | 0.0035 | 1.33E-10  | 0.000116 | 41.7        |
| rs3791679  | 2   | 56096892  | G  | A  | 0.2258 | 0.0165  | 0.0029 | 8.28E-09  | 0.000095 | 32.4        |
| rs6756943  | 2   | 64926764  | A  | G  | 0.3005 | 0.0213  | 0.0026 | 2.19E-16  | 0.000191 | 67.1        |
| rs11545482 | 2   | 70315987  | T  | C  | 0.0209 | -0.0899 | 0.0085 | 5.52E-26  | 0.000331 | 111.9       |
| rs72841131 | 2   | 70414741  | C  | T  | 0.0647 | 0.0314  | 0.0049 | 1.46E-10  | 0.000119 | 41.1        |
| rs4852953  | 2   | 73869908  | A  | G  | 0.3636 | 0.0149  | 0.0025 | 4.60E-09  | 0.000103 | 35.5        |
| rs17041868 | 2   | 111894720 | C  | T  | 0.0640 | 0.0279  | 0.0048 | 6.56E-09  | 0.000093 | 33.8        |
| rs4849181  | 2   | 113991970 | G  | A  | 0.3616 | 0.0192  | 0.0025 | 1.36E-14  | 0.000170 | 59.0        |
| rs17050272 | 2   | 121306440 | A  | G  | 0.4097 | -0.0228 | 0.0024 | 1.21E-20  | 0.000251 | 90.3        |
| rs17400325 | 2   | 178565913 | C  | T  | 0.0410 | 0.0564  | 0.0062 | 1.15E-19  | 0.000250 | 82.8        |
| rs3731696  | 2   | 203431804 | G  | A  | 0.1216 | -0.0220 | 0.0036 | 1.57E-09  | 0.000103 | 37.3        |

|            |   |           |   |   |        |         |        |           |          |       |
|------------|---|-----------|---|---|--------|---------|--------|-----------|----------|-------|
| rs7607369  | 2 | 219279097 | G | A | 0.4336 | 0.0189  | 0.0024 | 5.81E-15  | 0.000175 | 62.0  |
| rs3738951  | 2 | 225368321 | G | A | 0.4471 | 0.0148  | 0.0024 | 7.21E-10  | 0.000108 | 38.0  |
| rs17323117 | 2 | 230162971 | G | A | 0.0764 | 0.0302  | 0.0045 | 2.78E-11  | 0.000129 | 45.0  |
| rs7590861  | 2 | 231034785 | C | A | 0.3006 | -0.0180 | 0.0026 | 4.54E-12  | 0.000136 | 47.9  |
| rs3771576  | 2 | 242388550 | C | T | 0.2229 | 0.0166  | 0.0028 | 5.88E-09  | 0.000095 | 35.1  |
| rs7625680  | 3 | 11378069  | A | G | 0.3637 | 0.0153  | 0.0025 | 6.63E-10  | 0.000108 | 37.5  |
| rs4684859  | 3 | 12498401  | A | G | 0.4244 | 0.0138  | 0.0024 | 1.14E-08  | 0.000093 | 33.1  |
| rs9854148  | 3 | 23331350  | A | G | 0.3512 | -0.0148 | 0.0025 | 5.92E-09  | 0.000100 | 35.0  |
| rs4678732  | 3 | 33212485  | A | G | 0.3741 | 0.0167  | 0.0025 | 1.16E-11  | 0.000131 | 44.6  |
| rs11928797 | 3 | 33457493  | A | C | 0.1171 | 0.0288  | 0.0037 | 1.08E-14  | 0.000172 | 60.6  |
| rs13067987 | 3 | 42651209  | T | C | 0.1127 | 0.0206  | 0.0037 | 3.61E-08  | 0.000085 | 31.0  |
| rs4082155  | 3 | 47125385  | A | G | 0.4246 | 0.0190  | 0.0024 | 4.41E-15  | 0.000176 | 62.7  |
| rs9825535  | 3 | 50772664  | T | C | 0.1473 | -0.0210 | 0.0034 | 7.34E-10  | 0.000111 | 38.1  |
| rs4681968  | 3 | 57328867  | T | G | 0.2076 | -0.0167 | 0.0030 | 1.73E-08  | 0.000092 | 31.0  |
| rs9310077  | 3 | 88196644  | G | A | 0.1553 | 0.0288  | 0.0033 | 1.90E-18  | 0.000218 | 76.2  |
| rs3772102  | 3 | 98502628  | G | T | 0.4499 | 0.0210  | 0.0024 | 1.81E-18  | 0.000218 | 76.6  |
| rs13088318 | 3 | 101242751 | G | A | 0.3376 | 0.0286  | 0.0025 | 3.07E-29  | 0.000366 | 130.9 |
| rs75592719 | 3 | 101667708 | A | G | 0.0525 | -0.0315 | 0.0054 | 5.51E-09  | 0.000099 | 34.0  |
| rs9288851  | 3 | 107316938 | G | A | 0.1773 | -0.0233 | 0.0032 | 1.72E-13  | 0.000158 | 53.0  |
| rs4678144  | 3 | 124404399 | G | A | 0.2002 | 0.0181  | 0.0030 | 1.57E-09  | 0.000105 | 36.4  |
| rs645040   | 3 | 135926622 | T | G | 0.2266 | 0.0380  | 0.0028 | 7.51E-41  | 0.000506 | 184.2 |
| rs1199333  | 3 | 138091701 | T | G | 0.1829 | 0.0178  | 0.0031 | 8.11E-09  | 0.000095 | 33.0  |
| rs55752389 | 3 | 138848513 | T | C | 0.3025 | -0.0312 | 0.0026 | 4.86E-33  | 0.000411 | 144.0 |
| rs6763931  | 3 | 141102833 | A | G | 0.4467 | -0.0327 | 0.0024 | 4.46E-42  | 0.000529 | 185.6 |
| rs6799078  | 3 | 141630722 | G | A | 0.3643 | -0.0149 | 0.0025 | 1.60E-09  | 0.000103 | 35.5  |
| rs73238159 | 3 | 142078759 | T | C | 0.1305 | -0.0239 | 0.0036 | 2.21E-11  | 0.000130 | 44.1  |
| rs5398     | 3 | 170715830 | A | G | 0.2855 | 0.0197  | 0.0026 | 6.60E-14  | 0.000158 | 57.4  |
| rs572169   | 3 | 172165727 | T | C | 0.3180 | 0.0565  | 0.0026 | 2.59E-106 | 0.001385 | 472.2 |
| rs7614305  | 3 | 178912661 | A | G | 0.1866 | -0.0169 | 0.0030 | 2.65E-08  | 0.000087 | 31.7  |
| rs2193587  | 3 | 185990096 | T | C | 0.2141 | -0.0189 | 0.0029 | 9.51E-11  | 0.000120 | 42.5  |
| rs4452320  | 3 | 186381717 | G | A | 0.2493 | 0.0184  | 0.0028 | 2.49E-11  | 0.000127 | 43.2  |
| rs3748034  | 4 | 3446091   | T | G | 0.1412 | -0.0220 | 0.0034 | 1.45E-10  | 0.000117 | 41.9  |
| rs4234798  | 4 | 7219933   | G | T | 0.3841 | 0.0368  | 0.0025 | 4.24E-51  | 0.000641 | 216.7 |
| rs9991733  | 4 | 39420994  | G | A | 0.2862 | -0.0161 | 0.0026 | 1.16E-09  | 0.000106 | 38.3  |
| rs3912391  | 4 | 39698824  | A | G | 0.4932 | -0.0257 | 0.0024 | 9.47E-27  | 0.000330 | 114.7 |
| rs28551714 | 4 | 45131089  | A | G | 0.2812 | 0.0318  | 0.0027 | 4.37E-33  | 0.000409 | 138.7 |
| rs3775288  | 4 | 46391821  | G | A | 0.1258 | -0.0281 | 0.0036 | 1.13E-14  | 0.000174 | 60.9  |
| rs976002   | 4 | 69343287  | G | A | 0.2477 | -0.0349 | 0.0028 | 1.80E-36  | 0.000454 | 155.4 |
| rs1902023  | 4 | 69536084  | C | A | 0.4753 | -0.0259 | 0.0024 | 2.15E-27  | 0.000335 | 116.5 |
| rs897945   | 4 | 83838262  | T | G | 0.4405 | 0.0140  | 0.0024 | 6.14E-09  | 0.000097 | 34.0  |
| rs2280099  | 4 | 90035549  | G | A | 0.1791 | 0.0256  | 0.0031 | 2.78E-16  | 0.000193 | 68.2  |
| rs1444922  | 4 | 95912221  | G | A | 0.3755 | -0.0138 | 0.0025 | 2.00E-08  | 0.000089 | 30.5  |
| rs4306959  | 4 | 97584985  | G | A | 0.4624 | -0.0143 | 0.0024 | 2.51E-09  | 0.000102 | 35.5  |
| rs1126673  | 4 | 100045616 | T | C | 0.3025 | 0.0371  | 0.0026 | 9.18E-46  | 0.000581 | 203.6 |
| rs1229984  | 4 | 100239319 | C | T | 0.0223 | -0.0921 | 0.0078 | 3.31E-32  | 0.000369 | 139.4 |
| rs28590233 | 4 | 106011086 | T | C | 0.1980 | 0.0190  | 0.0030 | 3.18E-10  | 0.000115 | 40.1  |
| rs2667172  | 4 | 121749030 | C | T | 0.3137 | 0.0187  | 0.0027 | 6.79E-12  | 0.000151 | 48.0  |
| rs58148580 | 4 | 124758773 | T | C | 0.1091 | 0.0260  | 0.0039 | 1.72E-11  | 0.000131 | 44.4  |
| rs6534673  | 4 | 129142166 | T | C | 0.2810 | 0.0155  | 0.0027 | 5.21E-09  | 0.000097 | 33.0  |
| rs1492820  | 4 | 145650021 | A | G | 0.4643 | -0.0136 | 0.0024 | 1.17E-08  | 0.000092 | 32.1  |
| rs7697204  | 4 | 148980174 | T | C | 0.2574 | 0.0234  | 0.0027 | 6.54E-18  | 0.000209 | 75.1  |
| rs17540470 | 4 | 169349568 | T | C | 0.1829 | 0.0176  | 0.0031 | 1.56E-08  | 0.000093 | 32.2  |
| rs13184788 | 5 | 39075388  | T | C | 0.4448 | -0.0234 | 0.0024 | 2.03E-22  | 0.000270 | 95.1  |
| rs62372052 | 5 | 42724294  | G | A | 0.1110 | 0.0581  | 0.0039 | 9.44E-50  | 0.000666 | 221.9 |
| rs7723160  | 5 | 42860681  | G | A | 0.2587 | 0.0198  | 0.0027 | 5.72E-13  | 0.000150 | 53.8  |
| rs13174925 | 5 | 44124113  | C | A | 0.2766 | 0.0166  | 0.0027 | 4.30E-10  | 0.000110 | 37.8  |
| rs271234   | 5 | 53075037  | A | G | 0.1507 | 0.0182  | 0.0033 | 4.62E-08  | 0.000085 | 30.4  |
| rs76026733 | 5 | 53263963  | C | T | 0.0536 | 0.0389  | 0.0054 | 4.39E-13  | 0.000154 | 51.9  |
| rs7736186  | 5 | 58270494  | T | C | 0.0282 | -0.0400 | 0.0073 | 4.63E-08  | 0.000088 | 30.0  |
| rs11738977 | 5 | 59018442  | G | A | 0.3255 | -0.0367 | 0.0025 | 2.98E-47  | 0.000591 | 215.5 |
| rs13162864 | 5 | 59207614  | C | A | 0.1280 | -0.0201 | 0.0036 | 1.65E-08  | 0.000090 | 31.2  |
| rs185077   | 5 | 78331823  | C | T | 0.4893 | 0.0147  | 0.0024 | 6.92E-10  | 0.000108 | 37.5  |
| rs1350437  | 5 | 87192117  | T | G | 0.2475 | -0.0159 | 0.0028 | 7.43E-09  | 0.000094 | 32.2  |

|             |   |           |   |   |        |         |        |           |          |        |
|-------------|---|-----------|---|---|--------|---------|--------|-----------|----------|--------|
| rs9293511   | 5 | 88416354  | T | C | 0.3851 | -0.0237 | 0.0024 | 4.19E-22  | 0.000266 | 97.5   |
| rs10515337  | 5 | 102301368 | C | T | 0.3163 | 0.0162  | 0.0026 | 5.88E-10  | 0.000114 | 38.8   |
| rs4705873   | 5 | 132267167 | A | G | 0.1654 | -0.0430 | 0.0032 | 2.17E-40  | 0.000510 | 180.6  |
| rs35096828  | 5 | 133897439 | C | T | 0.2773 | 0.0173  | 0.0027 | 7.98E-11  | 0.000120 | 41.1   |
| rs609385    | 5 | 134597267 | T | C | 0.4308 | -0.0206 | 0.0024 | 1.25E-17  | 0.000208 | 73.7   |
| rs757647    | 5 | 137707315 | A | G | 0.2015 | 0.0384  | 0.0029 | 4.71E-39  | 0.000474 | 175.3  |
| rs258775    | 5 | 142564823 | C | A | 0.1727 | -0.0254 | 0.0032 | 1.17E-15  | 0.000184 | 63.0   |
| rs17413389  | 5 | 143078627 | G | T | 0.2475 | -0.0177 | 0.0027 | 1.13E-10  | 0.000117 | 43.0   |
| rs4282339   | 5 | 168256240 | A | G | 0.2068 | -0.0562 | 0.0030 | 2.06E-80  | 0.001036 | 350.9  |
| rs17714046  | 5 | 180661980 | C | T | 0.0466 | 0.0410  | 0.0057 | 5.38E-13  | 0.000149 | 51.7   |
| rs9502597   | 6 | 7307699   | C | T | 0.2033 | 0.0171  | 0.0030 | 6.80E-09  | 0.000095 | 32.5   |
| rs2296198   | 6 | 18399750  | C | T | 0.2482 | 0.0161  | 0.0028 | 5.06E-09  | 0.000097 | 33.1   |
| rs12210951  | 6 | 21936868  | G | A | 0.2794 | 0.0168  | 0.0027 | 4.37E-10  | 0.000114 | 38.7   |
| rs7742369   | 6 | 34165721  | G | A | 0.1750 | -0.0252 | 0.0031 | 6.16E-16  | 0.000183 | 66.1   |
| rs1929849   | 6 | 35205541  | C | T | 0.1550 | -0.0212 | 0.0033 | 8.38E-11  | 0.000118 | 41.3   |
| rs2235711   | 6 | 38148770  | T | C | 0.2475 | 0.0224  | 0.0027 | 2.93E-16  | 0.000187 | 68.8   |
| rs9471969   | 6 | 42906384  | T | G | 0.2547 | -0.0168 | 0.0027 | 8.80E-10  | 0.000107 | 38.7   |
| rs6905288   | 6 | 43758873  | A | G | 0.4325 | 0.0176  | 0.0024 | 3.28E-13  | 0.000152 | 53.8   |
| rs4715332   | 6 | 52669185  | A | C | 0.4277 | 0.0173  | 0.0024 | 1.22E-12  | 0.000147 | 52.0   |
| rs9352613   | 6 | 79424433  | G | A | 0.3699 | -0.0156 | 0.0025 | 3.44E-10  | 0.000113 | 38.9   |
| rs6934603   | 6 | 87994015  | G | A | 0.4875 | -0.0284 | 0.0024 | 9.42E-33  | 0.000403 | 140.0  |
| rs499624    | 6 | 100087783 | T | G | 0.3301 | -0.0186 | 0.0026 | 3.32E-13  | 0.000153 | 51.2   |
| rs7759938   | 6 | 105378954 | T | C | 0.3234 | 0.0140  | 0.0026 | 4.97E-08  | 0.000086 | 29.0   |
| rs2153960   | 6 | 108988184 | A | G | 0.2877 | 0.0499  | 0.0026 | 8.73E-80  | 0.001021 | 368.3  |
| rs1361108   | 6 | 126767600 | T | C | 0.4543 | 0.0672  | 0.0024 | 3.75E-173 | 0.002239 | 784.0  |
| rs72961013  | 6 | 127529780 | A | G | 0.0670 | 0.0307  | 0.0049 | 3.11E-10  | 0.000118 | 39.3   |
| rs4421216   | 6 | 128365434 | G | A | 0.1820 | 0.0170  | 0.0031 | 4.59E-08  | 0.000086 | 30.1   |
| rs4895842   | 6 | 129349539 | C | T | 0.3154 | -0.0166 | 0.0026 | 1.00E-10  | 0.000119 | 40.8   |
| rs9388768   | 6 | 130374102 | A | C | 0.3269 | -0.0188 | 0.0025 | 1.60E-13  | 0.000156 | 56.6   |
| rs9390459   | 6 | 147680359 | G | A | 0.4252 | 0.0184  | 0.0024 | 2.36E-14  | 0.000165 | 58.8   |
| rs2234693   | 6 | 152163335 | C | T | 0.4575 | 0.0254  | 0.0024 | 2.10E-26  | 0.000320 | 112.0  |
| rs674882    | 6 | 153407553 | C | T | 0.4151 | 0.0213  | 0.0024 | 1.11E-18  | 0.000220 | 78.8   |
| rs677830    | 6 | 154428666 | T | C | 0.2537 | -0.0238 | 0.0027 | 4.23E-18  | 0.000215 | 77.7   |
| rs927450    | 6 | 160182096 | G | A | 0.4248 | 0.0132  | 0.0024 | 4.59E-08  | 0.000085 | 30.3   |
| rs7750288   | 6 | 160400147 | G | A | 0.2858 | 0.0245  | 0.0027 | 2.30E-20  | 0.000245 | 82.3   |
| rs555754    | 6 | 160769423 | A | G | 0.4670 | -0.0349 | 0.0024 | 1.65E-47  | 0.000606 | 211.5  |
| rs504371    | 6 | 165724052 | A | C | 0.3319 | 0.0139  | 0.0025 | 3.80E-08  | 0.000086 | 30.9   |
| rs3008049   | 6 | 166063617 | G | A | 0.3186 | -0.0152 | 0.0027 | 1.10E-08  | 0.000100 | 31.7   |
| rs9295315   | 6 | 166254991 | A | G | 0.2428 | -0.0174 | 0.0028 | 3.56E-10  | 0.000111 | 38.6   |
| rs2323034   | 6 | 166306809 | A | G | 0.4325 | 0.0371  | 0.0024 | 1.20E-53  | 0.000676 | 239.0  |
| rs7802508   | 7 | 1191689   | A | G | 0.4115 | 0.0214  | 0.0024 | 1.22E-18  | 0.000222 | 79.5   |
| rs3889797   | 7 | 1877924   | C | A | 0.4239 | -0.0169 | 0.0024 | 2.26E-12  | 0.000139 | 49.6   |
| rs2533879   | 7 | 2859847   | A | G | 0.3014 | 0.0205  | 0.0026 | 5.23E-15  | 0.000177 | 62.2   |
| rs62439737  | 7 | 6779810   | G | A | 0.1536 | -0.0402 | 0.0033 | 8.26E-35  | 0.000420 | 148.4  |
| rs6969690   | 7 | 14214561  | G | T | 0.2167 | -0.0253 | 0.0029 | 2.04E-18  | 0.000217 | 76.1   |
| rs11761979  | 7 | 31018138  | A | C | 0.2352 | -0.0200 | 0.0028 | 1.92E-12  | 0.000144 | 51.0   |
| rs2228078   | 7 | 31018852  | C | T | 0.0150 | 0.0584  | 0.0097 | 1.58E-09  | 0.000101 | 36.2   |
| rs62467370  | 7 | 32929628  | A | C | 0.0545 | 0.0290  | 0.0053 | 3.84E-08  | 0.000087 | 29.9   |
| rs62460537  | 7 | 44936916  | G | A | 0.0715 | -0.0296 | 0.0047 | 2.89E-10  | 0.000116 | 39.7   |
| rs6958337   | 7 | 45764528  | C | T | 0.0829 | 0.0345  | 0.0044 | 2.70E-15  | 0.000181 | 61.5   |
| rs74516857  | 7 | 45907939  | A | G | 0.0543 | 0.0304  | 0.0053 | 8.88E-09  | 0.000095 | 32.9   |
| rs11977526  | 7 | 46008110  | A | G | 0.4004 | -0.0448 | 0.0024 | 6.08E-76  | 0.000964 | 348.4  |
| rs116945878 | 7 | 46276386  | T | C | 0.0209 | 0.0497  | 0.0085 | 5.27E-09  | 0.000101 | 34.2   |
| rs78546112  | 7 | 46329630  | T | C | 0.0606 | -0.0412 | 0.0050 | 3.06E-16  | 0.000193 | 67.9   |
| rs11979093  | 7 | 46501098  | A | G | 0.1585 | 0.0574  | 0.0032 | 7.14E-71  | 0.000879 | 321.8  |
| rs71545944  | 7 | 46659170  | G | A | 0.0195 | -0.0549 | 0.0087 | 2.64E-10  | 0.000115 | 39.8   |
| rs117890478 | 7 | 46713054  | G | T | 0.0150 | 0.0647  | 0.0101 | 1.61E-10  | 0.000124 | 41.0   |
| rs35640690  | 7 | 46719105  | C | T | 0.2723 | -0.1038 | 0.0027 | 1.00E-200 | 0.004270 | 1478.0 |
| rs11762356  | 7 | 46956047  | G | A | 0.0248 | -0.0534 | 0.0078 | 8.52E-12  | 0.000138 | 46.9   |
| rs7790734   | 7 | 46970040  | A | G | 0.3138 | 0.0314  | 0.0026 | 5.66E-34  | 0.000425 | 145.9  |
| rs2174460   | 7 | 55991292  | A | G | 0.2475 | -0.0169 | 0.0028 | 1.37E-09  | 0.000106 | 36.4   |
| rs13233571  | 7 | 72971231  | T | C | 0.1237 | 0.0339  | 0.0036 | 1.22E-20  | 0.000249 | 88.7   |
| rs799157    | 7 | 73020301  | C | T | 0.0434 | 0.0323  | 0.0059 | 4.12E-08  | 0.000087 | 30.0   |



|             |    |           |   |   |        |         |        |           |          |       |
|-------------|----|-----------|---|---|--------|---------|--------|-----------|----------|-------|
| rs2527886   | 7  | 99552168  | C | T | 0.4239 | -0.0145 | 0.0024 | 2.30E-09  | 0.000103 | 36.5  |
| rs13246732  | 7  | 113775765 | T | C | 0.3170 | 0.0164  | 0.0026 | 2.45E-10  | 0.000116 | 39.8  |
| rs11556924  | 7  | 129663496 | T | C | 0.3898 | -0.0142 | 0.0025 | 8.67E-09  | 0.000096 | 32.3  |
| rs157934    | 7  | 130585492 | C | T | 0.3054 | 0.0576  | 0.0026 | 2.32E-109 | 0.001408 | 490.8 |
| rs2048672   | 7  | 130653851 | A | C | 0.2906 | -0.0170 | 0.0026 | 8.77E-11  | 0.000119 | 42.8  |
| rs273957    | 7  | 137600690 | T | C | 0.3846 | -0.0205 | 0.0025 | 1.31E-16  | 0.000199 | 67.2  |
| rs7811152   | 7  | 138238844 | A | G | 0.4784 | 0.0163  | 0.0024 | 9.16E-12  | 0.000133 | 46.1  |
| rs3857873   | 7  | 138721901 | T | C | 0.4950 | 0.0149  | 0.0024 | 7.53E-10  | 0.000111 | 38.5  |
| rs7789908   | 7  | 150530196 | G | T | 0.2096 | 0.0203  | 0.0030 | 6.16E-12  | 0.000137 | 45.8  |
| rs6982207   | 8  | 5551845   | A | G | 0.2360 | 0.0163  | 0.0028 | 6.39E-09  | 0.000096 | 33.9  |
| rs9657541   | 8  | 10643164  | T | C | 0.2048 | -0.0203 | 0.0030 | 1.66E-11  | 0.000134 | 45.8  |
| rs76393968  | 8  | 16282937  | A | G | 0.0161 | -0.0585 | 0.0096 | 1.13E-09  | 0.000108 | 37.1  |
| rs1495741   | 8  | 18272881  | A | G | 0.2210 | -0.0268 | 0.0029 | 7.56E-21  | 0.000247 | 85.4  |
| rs2081687   | 8  | 59388565  | C | T | 0.3365 | -0.0250 | 0.0025 | 3.76E-23  | 0.000279 | 100.0 |
| rs1583164   | 8  | 77105970  | G | A | 0.4041 | 0.0183  | 0.0024 | 6.13E-14  | 0.000161 | 58.1  |
| rs6473015   | 8  | 78178485  | C | A | 0.2856 | 0.0198  | 0.0026 | 8.04E-14  | 0.000160 | 58.0  |
| rs445036    | 8  | 81408409  | C | T | 0.2884 | -0.0204 | 0.0026 | 1.39E-14  | 0.000171 | 61.6  |
| rs1693551   | 8  | 101675584 | C | T | 0.4611 | -0.0155 | 0.0024 | 1.17E-10  | 0.000119 | 41.7  |
| rs2514843   | 8  | 109063434 | T | C | 0.4590 | -0.0136 | 0.0024 | 1.36E-08  | 0.000092 | 32.1  |
| rs2293889   | 8  | 116599199 | G | T | 0.4335 | -0.0220 | 0.0024 | 2.15E-19  | 0.000238 | 84.0  |
| rs6471133   | 8  | 134611160 | C | A | 0.1984 | 0.0258  | 0.0030 | 4.38E-18  | 0.000212 | 74.0  |
| rs68013747  | 8  | 135656665 | A | G | 0.3068 | 0.0209  | 0.0026 | 6.60E-16  | 0.000186 | 64.6  |
| rs11136336  | 8  | 145007187 | A | G | 0.3973 | 0.0166  | 0.0025 | 5.35E-11  | 0.000132 | 44.1  |
| rs1270231   | 9  | 4840877   | A | G | 0.1131 | 0.0459  | 0.0038 | 5.29E-34  | 0.000423 | 145.9 |
| rs75565599  | 9  | 4851008   | C | A | 0.0363 | -0.0593 | 0.0064 | 1.58E-20  | 0.000246 | 85.9  |
| rs9969735   | 9  | 4888585   | A | C | 0.4975 | -0.0141 | 0.0024 | 3.58E-09  | 0.000099 | 34.5  |
| rs72701684  | 9  | 5211191   | T | G | 0.0482 | 0.0494  | 0.0057 | 2.58E-18  | 0.000224 | 75.1  |
| rs6475614   | 9  | 22153265  | C | T | 0.3144 | -0.0189 | 0.0026 | 1.65E-13  | 0.000154 | 52.8  |
| rs56324928  | 9  | 33933136  | C | A | 0.2163 | 0.0206  | 0.0029 | 1.30E-12  | 0.000144 | 50.5  |
| rs1367628   | 9  | 74069700  | T | G | 0.1803 | 0.0192  | 0.0031 | 5.05E-10  | 0.000109 | 38.4  |
| rs4471123   | 9  | 86700737  | A | G | 0.4997 | -0.0140 | 0.0024 | 4.55E-09  | 0.000098 | 34.0  |
| rs6559365   | 9  | 92209279  | A | G | 0.4962 | -0.0153 | 0.0024 | 3.71E-10  | 0.000117 | 40.6  |
| rs9695734   | 9  | 96407983  | T | C | 0.1821 | 0.0249  | 0.0031 | 1.12E-15  | 0.000185 | 64.5  |
| rs10512236  | 9  | 97630451  | T | G | 0.0591 | -0.0364 | 0.0050 | 5.61E-13  | 0.000147 | 53.0  |
| rs4743034   | 9  | 109632353 | A | G | 0.2250 | 0.0220  | 0.0028 | 8.81E-15  | 0.000169 | 61.7  |
| rs1981268   | 9  | 111637331 | A | C | 0.1148 | 0.0212  | 0.0037 | 1.37E-08  | 0.000091 | 32.8  |
| rs28410315  | 9  | 119338898 | G | A | 0.1466 | 0.0243  | 0.0033 | 3.72E-13  | 0.000148 | 54.2  |
| rs1129      | 9  | 128199873 | T | C | 0.3677 | -0.0220 | 0.0025 | 9.66E-19  | 0.000225 | 77.4  |
| rs2810490   | 9  | 136923118 | A | G | 0.2838 | -0.0152 | 0.0026 | 8.98E-09  | 0.000094 | 34.2  |
| rs1832007   | 10 | 5254847   | G | A | 0.1551 | 0.0558  | 0.0033 | 1.58E-62  | 0.000816 | 285.9 |
| rs2277222   | 10 | 13494594  | C | T | 0.3003 | 0.0143  | 0.0026 | 4.15E-08  | 0.000086 | 30.3  |
| rs12769257  | 10 | 21736100  | C | T | 0.1837 | -0.0220 | 0.0031 | 1.08E-12  | 0.000145 | 50.4  |
| rs7899156   | 10 | 22822524  | A | C | 0.3528 | 0.0154  | 0.0025 | 9.46E-10  | 0.000108 | 37.9  |
| rs2754369   | 10 | 38655478  | T | C | 0.2330 | 0.0157  | 0.0028 | 3.19E-08  | 0.000088 | 31.4  |
| rs7072243   | 10 | 50319387  | A | G | 0.3916 | 0.0141  | 0.0024 | 7.95E-09  | 0.000095 | 34.5  |
| rs293281    | 10 | 53217522  | A | G | 0.3313 | 0.0142  | 0.0025 | 1.91E-08  | 0.000089 | 32.3  |
| rs1471246   | 10 | 62074139  | A | G | 0.3978 | 0.0171  | 0.0024 | 2.71E-12  | 0.000140 | 50.8  |
| rs16926292  | 10 | 71149389  | C | T | 0.0996 | -0.0221 | 0.0040 | 2.90E-08  | 0.000088 | 30.5  |
| rs7079868   | 10 | 72020703  | A | C | 0.0630 | 0.0299  | 0.0049 | 1.14E-09  | 0.000106 | 37.2  |
| rs6480781   | 10 | 77140707  | T | G | 0.3917 | -0.0143 | 0.0024 | 4.49E-09  | 0.000097 | 35.5  |
| rs2068888   | 10 | 94839642  | A | G | 0.4489 | -0.0240 | 0.0024 | 1.39E-23  | 0.000285 | 100.0 |
| rs9630085   | 10 | 95333063  | G | A | 0.2006 | 0.0214  | 0.0030 | 4.29E-13  | 0.000147 | 50.9  |
| rs116454156 | 10 | 95347041  | A | G | 0.0157 | 0.0767  | 0.0095 | 6.34E-16  | 0.000182 | 65.2  |
| rs2274223   | 10 | 96066341  | G | A | 0.2960 | -0.0167 | 0.0026 | 1.44E-10  | 0.000116 | 41.3  |
| rs10509746  | 10 | 102656897 | C | T | 0.4479 | 0.0258  | 0.0024 | 5.23E-27  | 0.000329 | 115.6 |
| rs11191424  | 10 | 104625886 | A | G | 0.3269 | -0.0153 | 0.0025 | 1.92E-09  | 0.000103 | 37.5  |
| rs11197593  | 10 | 117982741 | C | T | 0.4628 | 0.0184  | 0.0024 | 2.44E-14  | 0.000168 | 58.8  |
| rs6421044   | 11 | 1588110   | T | C | 0.4543 | -0.0163 | 0.0024 | 9.86E-12  | 0.000132 | 46.1  |
| rs7115466   | 11 | 2044150   | A | G | 0.2892 | 0.0166  | 0.0026 | 3.52E-10  | 0.000113 | 40.8  |
| rs11042751  | 11 | 2149864   | C | T | 0.2447 | 0.0705  | 0.0028 | 1.64E-138 | 0.001837 | 634.0 |
| rs1124699   | 11 | 2164990   | A | G | 0.0765 | 0.0693  | 0.0044 | 2.56E-55  | 0.000679 | 248.1 |
| rs10834966  | 11 | 3749585   | C | A | 0.2168 | -0.0219 | 0.0029 | 6.34E-14  | 0.000163 | 57.0  |
| rs12277932  | 11 | 8631669   | C | T | 0.4741 | 0.0139  | 0.0025 | 3.06E-08  | 0.000096 | 30.9  |

|             |    |           |   |   |        |         |        |           |          |       |
|-------------|----|-----------|---|---|--------|---------|--------|-----------|----------|-------|
| rs7947951   | 11 | 13356030  | G | A | 0.3088 | 0.0189  | 0.0026 | 2.53E-13  | 0.000152 | 52.8  |
| rs72858774  | 11 | 15772442  | T | G | 0.0787 | -0.0290 | 0.0044 | 4.66E-11  | 0.000122 | 43.4  |
| rs10832918  | 11 | 18335684  | A | G | 0.3710 | -0.0211 | 0.0025 | 1.31E-17  | 0.000208 | 71.2  |
| rs34452566  | 11 | 27793470  | T | G | 0.1986 | 0.0169  | 0.0030 | 2.55E-08  | 0.000091 | 31.7  |
| rs12294104  | 11 | 30382899  | T | C | 0.1739 | 0.0215  | 0.0032 | 1.34E-11  | 0.000133 | 45.1  |
| rs7120548   | 11 | 47662932  | C | T | 0.3005 | -0.0188 | 0.0026 | 5.52E-13  | 0.000149 | 52.3  |
| rs2047812   | 11 | 48162042  | G | A | 0.1945 | -0.0398 | 0.0030 | 3.74E-39  | 0.000496 | 176.0 |
| rs78089241  | 11 | 48214064  | G | A | 0.0329 | 0.0423  | 0.0070 | 1.75E-09  | 0.000114 | 36.5  |
| rs538169    | 11 | 59503589  | C | T | 0.0558 | 0.0287  | 0.0051 | 1.72E-08  | 0.000087 | 31.7  |
| rs174550    | 11 | 61571478  | C | T | 0.3454 | -0.0201 | 0.0025 | 2.07E-15  | 0.000183 | 64.6  |
| rs4636677   | 11 | 65458994  | T | G | 0.0627 | 0.0314  | 0.0050 | 2.69E-10  | 0.000116 | 39.4  |
| rs56088284  | 11 | 66899619  | G | A | 0.0839 | 0.0319  | 0.0044 | 3.57E-13  | 0.000156 | 52.6  |
| rs4980661   | 11 | 69306579  | A | G | 0.4721 | 0.0142  | 0.0024 | 3.14E-09  | 0.000101 | 35.0  |
| rs2450136   | 11 | 77925273  | G | T | 0.1635 | -0.0223 | 0.0032 | 2.52E-12  | 0.000136 | 48.6  |
| rs61904289  | 11 | 85994731  | T | C | 0.3084 | 0.0167  | 0.0026 | 1.43E-10  | 0.000119 | 41.3  |
| rs11020842  | 11 | 94317202  | A | G | 0.0362 | -0.0385 | 0.0065 | 3.52E-09  | 0.000103 | 35.1  |
| rs11604671  | 11 | 113268059 | A | G | 0.4914 | 0.0147  | 0.0024 | 7.97E-10  | 0.000108 | 37.5  |
| rs10892562  | 11 | 120221618 | G | A | 0.3831 | 0.0164  | 0.0024 | 1.90E-11  | 0.000127 | 46.7  |
| rs10892919  | 11 | 122736571 | T | C | 0.4332 | 0.0150  | 0.0024 | 5.38E-10  | 0.000110 | 39.1  |
| rs11220462  | 11 | 126243952 | A | G | 0.1331 | -0.0205 | 0.0035 | 6.90E-09  | 0.000097 | 34.3  |
| rs2856321   | 12 | 11855773  | A | G | 0.3607 | -0.0262 | 0.0025 | 5.64E-26  | 0.000317 | 109.8 |
| rs56234529  | 12 | 31638712  | T | C | 0.1890 | -0.0168 | 0.0031 | 4.45E-08  | 0.000087 | 29.4  |
| rs6488006   | 12 | 31908357  | C | T | 0.1089 | -0.0245 | 0.0037 | 4.70E-11  | 0.000116 | 43.8  |
| rs118047082 | 12 | 31946325  | T | C | 0.0142 | 0.0624  | 0.0104 | 2.03E-09  | 0.000109 | 36.0  |
| rs66550728  | 12 | 31948210  | G | A | 0.1475 | 0.0551  | 0.0034 | 2.74E-59  | 0.000763 | 262.6 |
| rs1621686   | 12 | 32084875  | G | A | 0.2935 | 0.0194  | 0.0026 | 9.76E-14  | 0.000156 | 55.7  |
| rs11519432  | 12 | 34675949  | T | C | 0.3967 | 0.0164  | 0.0025 | 2.65E-11  | 0.000129 | 43.0  |
| rs6582708   | 12 | 38851355  | C | T | 0.0095 | 0.0629  | 0.0114 | 3.41E-08  | 0.000074 | 30.4  |
| rs7306229   | 12 | 46334832  | T | C | 0.4959 | -0.0150 | 0.0024 | 4.23E-10  | 0.000112 | 39.1  |
| rs705708    | 12 | 56488913  | A | G | 0.4724 | -0.0140 | 0.0024 | 5.31E-09  | 0.000098 | 34.0  |
| rs2657879   | 12 | 56865338  | G | A | 0.1823 | -0.0196 | 0.0031 | 2.54E-10  | 0.000115 | 40.0  |
| rs78607331  | 12 | 57648644  | T | C | 0.0452 | -0.0361 | 0.0058 | 5.85E-10  | 0.000113 | 38.7  |
| rs812315    | 12 | 57993490  | A | G | 0.2385 | 0.0165  | 0.0028 | 3.78E-09  | 0.000099 | 34.7  |
| rs1351394   | 12 | 66351826  | C | T | 0.4914 | 0.0232  | 0.0024 | 3.12E-22  | 0.000269 | 93.4  |
| rs7306772   | 12 | 89914142  | G | T | 0.2872 | -0.0148 | 0.0026 | 2.14E-08  | 0.000090 | 32.4  |
| rs2072593   | 12 | 93970026  | C | T | 0.2069 | -0.0190 | 0.0030 | 1.62E-10  | 0.000118 | 40.1  |
| rs4144501   | 12 | 94156587  | A | G | 0.4863 | 0.0158  | 0.0024 | 3.66E-11  | 0.000125 | 43.3  |
| rs10777858  | 12 | 97792745  | T | G | 0.4714 | -0.0132 | 0.0024 | 3.59E-08  | 0.000087 | 30.3  |
| rs249624    | 12 | 98191847  | T | C | 0.1671 | 0.0216  | 0.0032 | 1.41E-11  | 0.000130 | 45.6  |
| rs78597439  | 12 | 102716172 | T | C | 0.0200 | -0.0680 | 0.0086 | 3.16E-15  | 0.000182 | 62.5  |
| rs11111274  | 12 | 102838128 | A | G | 0.2635 | -0.0795 | 0.0027 | 7.94E-195 | 0.002453 | 867.0 |
| rs79218426  | 12 | 102889497 | T | C | 0.0393 | 0.0633  | 0.0059 | 4.02E-27  | 0.000303 | 115.1 |
| rs10860878  | 12 | 102963550 | T | C | 0.4394 | -0.0202 | 0.0024 | 5.50E-17  | 0.000201 | 70.8  |
| rs10745954  | 12 | 103483094 | G | A | 0.4806 | 0.0159  | 0.0024 | 3.25E-11  | 0.000126 | 43.9  |
| rs7314285   | 12 | 111522026 | G | T | 0.0679 | 0.0541  | 0.0046 | 1.29E-31  | 0.000371 | 138.3 |
| rs11067228  | 12 | 115094260 | G | A | 0.4497 | 0.0185  | 0.0024 | 1.48E-14  | 0.000169 | 59.4  |
| rs2460488   | 12 | 116187660 | A | G | 0.1723 | -0.0210 | 0.0032 | 3.33E-11  | 0.000126 | 43.1  |
| rs75938105  | 12 | 116261411 | T | C | 0.0353 | 0.0442  | 0.0065 | 1.50E-11  | 0.000133 | 46.2  |
| rs7305618   | 12 | 121402932 | T | C | 0.2291 | -0.0237 | 0.0028 | 4.35E-17  | 0.000198 | 71.6  |
| rs1800574   | 12 | 121416864 | T | C | 0.0291 | 0.1445  | 0.0070 | 5.13E-94  | 0.001180 | 426.1 |
| rs11060762  | 12 | 123403710 | A | C | 0.0839 | -0.0252 | 0.0043 | 4.78E-09  | 0.000098 | 34.3  |
| rs9578326   | 13 | 21487599  | T | G | 0.2265 | -0.0178 | 0.0028 | 3.36E-10  | 0.000111 | 40.4  |
| rs76750172  | 13 | 28395297  | T | C | 0.0240 | 0.0577  | 0.0079 | 2.94E-13  | 0.000156 | 53.3  |
| rs9549092   | 13 | 40754324  | C | T | 0.1801 | 0.0399  | 0.0031 | 6.87E-38  | 0.000470 | 165.7 |
| rs4142110   | 13 | 42754522  | C | T | 0.3847 | -0.0143 | 0.0025 | 6.34E-09  | 0.000097 | 32.7  |
| rs75276039  | 13 | 45495991  | G | A | 0.0316 | 0.0395  | 0.0068 | 5.07E-09  | 0.000096 | 33.7  |
| rs9534448   | 13 | 47212961  | A | G | 0.2407 | 0.0213  | 0.0028 | 2.98E-14  | 0.000166 | 57.9  |
| rs45604939  | 13 | 49775997  | G | A | 0.0698 | -0.0266 | 0.0047 | 2.08E-08  | 0.000092 | 32.0  |
| rs61957204  | 13 | 74084684  | A | G | 0.0792 | 0.0295  | 0.0045 | 4.44E-11  | 0.000127 | 43.0  |
| rs1539182   | 13 | 74840527  | T | C | 0.4576 | 0.0137  | 0.0024 | 1.15E-08  | 0.000093 | 32.6  |
| rs9521492   | 13 | 110381691 | G | A | 0.3814 | 0.0144  | 0.0025 | 1.22E-08  | 0.000098 | 33.2  |
| rs9577924   | 13 | 114545317 | G | A | 0.2599 | 0.0193  | 0.0027 | 7.55E-13  | 0.000143 | 51.1  |
| rs8017377   | 14 | 24883887  | A | G | 0.4756 | -0.0160 | 0.0024 | 2.22E-11  | 0.000128 | 44.4  |

|             |    |           |   |   |        |         |        |           |          |       |
|-------------|----|-----------|---|---|--------|---------|--------|-----------|----------|-------|
| rs8015400   | 14 | 25930988  | A | C | 0.3207 | 0.0156  | 0.0026 | 2.25E-09  | 0.000106 | 36.0  |
| rs33912345  | 14 | 60976537  | A | C | 0.3878 | -0.0234 | 0.0025 | 2.32E-21  | 0.000260 | 87.6  |
| rs36215895  | 14 | 64676751  | T | C | 0.0095 | -0.0821 | 0.0126 | 6.16E-11  | 0.000127 | 42.5  |
| rs4902647   | 14 | 69254191  | T | C | 0.4639 | -0.0160 | 0.0024 | 1.89E-11  | 0.000127 | 44.4  |
| rs8007859   | 14 | 69704553  | T | G | 0.3849 | -0.0155 | 0.0025 | 3.34E-10  | 0.000114 | 38.4  |
| rs887506    | 14 | 74219367  | G | A | 0.3929 | -0.0137 | 0.0024 | 1.76E-08  | 0.000090 | 32.6  |
| rs13379042  | 14 | 74250100  | C | T | 0.2757 | -0.0245 | 0.0028 | 2.05E-18  | 0.000240 | 76.6  |
| rs175012    | 14 | 75455810  | C | A | 0.4659 | -0.0173 | 0.0024 | 5.45E-13  | 0.000149 | 52.0  |
| rs11625365  | 14 | 77908588  | G | A | 0.4695 | 0.0141  | 0.0024 | 4.09E-09  | 0.000099 | 34.5  |
| rs10146997  | 14 | 79945162  | G | A | 0.2234 | 0.0190  | 0.0029 | 3.46E-11  | 0.000125 | 42.9  |
| rs77004437  | 14 | 92793206  | T | C | 0.0889 | 0.0266  | 0.0042 | 3.11E-10  | 0.000115 | 40.1  |
| rs61992606  | 14 | 93943998  | A | G | 0.3111 | -0.0214 | 0.0026 | 9.77E-17  | 0.000196 | 67.7  |
| rs112635299 | 14 | 94838142  | T | G | 0.0211 | -0.0616 | 0.0085 | 5.31E-13  | 0.000157 | 52.5  |
| rs1802710   | 14 | 101200645 | C | T | 0.4836 | 0.0227  | 0.0024 | 2.85E-21  | 0.000257 | 89.5  |
| rs17747633  | 15 | 40916237  | G | A | 0.4551 | 0.0148  | 0.0024 | 9.36E-10  | 0.000109 | 38.0  |
| rs7165861   | 15 | 43423327  | A | G | 0.3562 | -0.0148 | 0.0025 | 5.26E-09  | 0.000100 | 35.0  |
| rs55707100  | 15 | 43820717  | T | C | 0.0248 | -0.1494 | 0.0077 | 5.17E-83  | 0.001080 | 376.5 |
| rs10459592  | 15 | 51536141  | G | T | 0.4304 | -0.0149 | 0.0025 | 4.05E-09  | 0.000109 | 35.5  |
| rs7178424   | 15 | 62380259  | T | C | 0.4500 | -0.0384 | 0.0024 | 1.13E-57  | 0.000730 | 256.0 |
| rs633275    | 15 | 64895319  | G | T | 0.1119 | -0.0229 | 0.0037 | 4.62E-10  | 0.000104 | 38.3  |
| rs266335    | 15 | 67344732  | A | G | 0.3316 | 0.0145  | 0.0025 | 9.99E-09  | 0.000093 | 33.6  |
| rs2033784   | 15 | 67449660  | G | A | 0.2969 | -0.0180 | 0.0026 | 4.63E-12  | 0.000135 | 47.9  |
| rs78049372  | 15 | 68429836  | T | C | 0.0508 | -0.0434 | 0.0056 | 9.51E-15  | 0.000182 | 60.1  |
| rs5742915   | 15 | 74336633  | C | T | 0.4616 | 0.0255  | 0.0024 | 2.86E-26  | 0.000323 | 112.9 |
| rs2930313   | 15 | 74609378  | G | A | 0.0774 | 0.0257  | 0.0044 | 4.86E-09  | 0.000094 | 34.1  |
| rs2307449   | 15 | 89863928  | G | T | 0.3889 | 0.0135  | 0.0024 | 3.30E-08  | 0.000087 | 31.6  |
| rs12900461  | 15 | 93552656  | T | C | 0.1659 | 0.0194  | 0.0032 | 1.31E-09  | 0.000104 | 36.8  |
| rs12912439  | 15 | 95828705  | T | C | 0.2981 | 0.0201  | 0.0026 | 1.38E-14  | 0.000169 | 59.8  |
| rs8027457   | 15 | 99204101  | C | T | 0.4877 | 0.0190  | 0.0024 | 2.08E-15  | 0.000180 | 62.7  |
| rs2684789   | 15 | 99492045  | A | G | 0.4521 | -0.0173 | 0.0024 | 5.18E-13  | 0.000148 | 52.0  |
| rs143076454 | 16 | 921179    | A | G | 0.0187 | -0.0712 | 0.0089 | 1.50E-15  | 0.000186 | 64.0  |
| rs742036    | 16 | 960725    | A | G | 0.3749 | 0.0205  | 0.0025 | 9.04E-17  | 0.000197 | 67.2  |
| rs4988483   | 16 | 1129010   | A | C | 0.0573 | -0.1682 | 0.0054 | 1.00E-200 | 0.003057 | 970.2 |
| rs60095937  | 16 | 1782964   | A | C | 0.0160 | -0.0958 | 0.0090 | 2.10E-26  | 0.000289 | 113.3 |
| rs72761177  | 16 | 1833508   | A | G | 0.0905 | 0.0749  | 0.0041 | 2.43E-74  | 0.000924 | 333.7 |
| rs344359    | 16 | 1838640   | C | T | 0.1787 | 0.0420  | 0.0031 | 1.05E-40  | 0.000518 | 183.6 |
| rs111845910 | 16 | 1991014   | A | G | 0.0727 | -0.0373 | 0.0049 | 2.25E-14  | 0.000188 | 57.9  |
| rs1369924   | 16 | 5924291   | C | A | 0.1864 | -0.0294 | 0.0031 | 3.28E-21  | 0.000262 | 89.9  |
| rs9924441   | 16 | 9047198   | T | C | 0.2521 | 0.0158  | 0.0027 | 7.86E-09  | 0.000094 | 34.2  |
| rs11646268  | 16 | 10498892  | C | T | 0.2551 | -0.0167 | 0.0028 | 1.40E-09  | 0.000106 | 35.6  |
| rs6498697   | 16 | 17479794  | G | A | 0.4943 | -0.0160 | 0.0024 | 2.22E-11  | 0.000128 | 44.4  |
| rs7197580   | 16 | 19278625  | A | G | 0.4828 | -0.0145 | 0.0024 | 1.30E-09  | 0.000105 | 36.5  |
| rs12443881  | 16 | 28841777  | T | C | 0.4017 | 0.0179  | 0.0025 | 3.19E-13  | 0.000154 | 51.3  |
| rs12447915  | 16 | 30089908  | T | C | 0.4698 | 0.0175  | 0.0024 | 2.20E-13  | 0.000153 | 53.2  |
| rs11865038  | 16 | 31095171  | T | C | 0.3842 | -0.0322 | 0.0025 | 2.24E-39  | 0.000491 | 165.9 |
| rs10521222  | 16 | 51158710  | T | C | 0.0481 | -0.0315 | 0.0056 | 2.24E-08  | 0.000091 | 31.6  |
| rs9929277   | 16 | 56158718  | G | A | 0.4425 | 0.0145  | 0.0024 | 1.49E-09  | 0.000104 | 36.5  |
| rs60762594  | 16 | 69098998  | C | T | 0.1037 | -0.0266 | 0.0039 | 9.06E-12  | 0.000132 | 46.5  |
| rs62052820  | 16 | 69575238  | A | G | 0.2291 | -0.0264 | 0.0029 | 2.32E-20  | 0.000246 | 82.9  |
| rs11859878  | 16 | 81515956  | T | C | 0.0716 | -0.0320 | 0.0047 | 8.77E-12  | 0.000136 | 46.4  |
| rs4888156   | 16 | 81604256  | C | T | 0.3392 | 0.0247  | 0.0025 | 8.68E-23  | 0.000274 | 97.6  |
| rs4889364   | 16 | 81719115  | A | G | 0.2517 | -0.0241 | 0.0028 | 3.08E-18  | 0.000219 | 74.1  |
| rs66720010  | 16 | 83979322  | G | A | 0.3735 | -0.0258 | 0.0025 | 1.85E-25  | 0.000312 | 106.5 |
| rs12453909  | 17 | 185338    | A | C | 0.2104 | 0.0161  | 0.0029 | 3.17E-08  | 0.000086 | 30.8  |
| rs4790814   | 17 | 1622177   | A | G | 0.4813 | -0.0155 | 0.0024 | 8.49E-11  | 0.000120 | 41.7  |
| rs35386490  | 17 | 7310006   | C | T | 0.2408 | 0.0160  | 0.0029 | 1.91E-08  | 0.000094 | 30.4  |
| rs727428    | 17 | 7537792   | C | T | 0.4434 | 0.0166  | 0.0024 | 4.53E-12  | 0.000136 | 47.8  |
| rs2301652   | 17 | 15928584  | G | T | 0.4575 | -0.0168 | 0.0024 | 2.20E-12  | 0.000140 | 49.0  |
| rs4925138   | 17 | 17992793  | G | T | 0.3825 | -0.0208 | 0.0026 | 1.25E-15  | 0.000204 | 64.0  |
| rs1877031   | 17 | 37814080  | A | G | 0.3322 | 0.0174  | 0.0025 | 7.52E-12  | 0.000134 | 48.4  |
| rs8070454   | 17 | 38160754  | T | C | 0.3889 | -0.0236 | 0.0025 | 5.42E-22  | 0.000265 | 89.1  |
| rs8068844   | 17 | 40571284  | C | T | 0.3406 | -0.0155 | 0.0025 | 6.59E-10  | 0.000108 | 38.4  |
| rs199448    | 17 | 44809001  | G | A | 0.2146 | 0.0209  | 0.0031 | 1.74E-11  | 0.000147 | 45.5  |

|            |    |          |   |   |        |         |        |          |          |       |
|------------|----|----------|---|---|--------|---------|--------|----------|----------|-------|
| rs8070132  | 17 | 57790206 | C | T | 0.1509 | -0.0217 | 0.0033 | 6.64E-11 | 0.000121 | 43.2  |
| rs2070776  | 17 | 62007498 | G | A | 0.3504 | 0.0372  | 0.0025 | 3.64E-50 | 0.000630 | 221.4 |
| rs76708468 | 17 | 62206299 | C | T | 0.0388 | 0.0865  | 0.0062 | 9.53E-44 | 0.000558 | 194.6 |
| rs1801689  | 17 | 64210580 | C | A | 0.0299 | 0.0863  | 0.0070 | 1.66E-34 | 0.000432 | 152.0 |
| rs77542162 | 17 | 67081278 | G | A | 0.0230 | 0.0508  | 0.0083 | 9.96E-10 | 0.000116 | 37.5  |
| rs6501601  | 17 | 71124903 | A | G | 0.3817 | -0.0142 | 0.0025 | 9.38E-09 | 0.000095 | 32.3  |
| rs1135688  | 17 | 73827205 | C | T | 0.3122 | -0.0164 | 0.0026 | 2.41E-10 | 0.000116 | 39.8  |
| rs2040176  | 18 | 892467   | T | C | 0.1424 | -0.0214 | 0.0034 | 3.63E-10 | 0.000112 | 39.6  |
| rs2198557  | 18 | 1620210  | G | T | 0.3030 | 0.0195  | 0.0026 | 9.73E-14 | 0.000161 | 56.3  |
| rs4468717  | 18 | 3457606  | T | C | 0.0777 | -0.0263 | 0.0045 | 5.57E-09 | 0.000099 | 34.2  |
| rs34233878 | 18 | 42594280 | C | T | 0.0981 | 0.0228  | 0.0041 | 2.16E-08 | 0.000092 | 30.9  |
| rs17487484 | 18 | 50723283 | G | T | 0.4926 | -0.0156 | 0.0024 | 8.59E-11 | 0.000122 | 42.3  |
| rs8099014  | 18 | 56109859 | A | C | 0.2605 | 0.0180  | 0.0027 | 3.05E-11 | 0.000125 | 44.4  |
| rs585187   | 18 | 58177124 | T | G | 0.4917 | 0.0157  | 0.0024 | 4.34E-11 | 0.000123 | 42.8  |
| rs12454712 | 18 | 60845884 | C | T | 0.3765 | -0.0187 | 0.0025 | 3.78E-14 | 0.000164 | 56.0  |
| rs2717128  | 18 | 74987632 | G | A | 0.1378 | -0.0213 | 0.0035 | 8.48E-10 | 0.000108 | 37.0  |
| rs7227840  | 18 | 75164995 | T | C | 0.3462 | -0.0172 | 0.0025 | 9.25E-12 | 0.000134 | 47.3  |
| rs632616   | 19 | 4976335  | T | C | 0.3140 | -0.0384 | 0.0026 | 5.54E-51 | 0.000635 | 218.1 |
| rs7248104  | 19 | 7224431  | A | G | 0.4148 | -0.0133 | 0.0024 | 3.84E-08 | 0.000086 | 30.7  |
| rs8105174  | 19 | 10347032 | T | C | 0.1878 | -0.0486 | 0.0031 | 2.64E-56 | 0.000721 | 245.8 |
| rs281437   | 19 | 10397238 | T | C | 0.3070 | -0.0169 | 0.0026 | 5.89E-11 | 0.000122 | 42.3  |
| rs12983573 | 19 | 10701833 | C | T | 0.3049 | 0.0142  | 0.0026 | 4.94E-08 | 0.000085 | 29.8  |
| rs4804528  | 19 | 10886206 | T | G | 0.4480 | -0.0252 | 0.0024 | 1.56E-25 | 0.000314 | 110.3 |
| rs737337   | 19 | 11347493 | C | T | 0.0761 | 0.0261  | 0.0044 | 2.06E-09 | 0.000096 | 35.2  |
| rs7258465  | 19 | 18533642 | C | T | 0.3487 | -0.0145 | 0.0025 | 6.53E-09 | 0.000095 | 33.6  |
| rs6510033  | 19 | 30710785 | G | A | 0.2734 | -0.0197 | 0.0027 | 1.50E-13 | 0.000154 | 53.2  |
| rs7599     | 19 | 36038390 | G | A | 0.3659 | -0.0138 | 0.0025 | 2.48E-08 | 0.000088 | 30.5  |
| rs3810291  | 19 | 47569003 | A | G | 0.3231 | -0.0164 | 0.0026 | 1.14E-10 | 0.000118 | 39.8  |
| rs10426201 | 19 | 48384749 | A | G | 0.1655 | -0.0229 | 0.0032 | 1.24E-12 | 0.000145 | 51.2  |
| rs2287922  | 19 | 49232226 | A | G | 0.4619 | -0.0286 | 0.0024 | 2.28E-32 | 0.000407 | 142.0 |
| rs12975366 | 19 | 54759361 | C | T | 0.3964 | -0.0208 | 0.0024 | 1.49E-17 | 0.000207 | 75.1  |
| rs16988490 | 20 | 3335431  | C | T | 0.2306 | 0.0190  | 0.0028 | 2.08E-11 | 0.000128 | 46.0  |
| rs34950733 | 20 | 20080775 | G | A | 0.2600 | -0.0432 | 0.0028 | 1.22E-52 | 0.000718 | 238.0 |
| rs6035613  | 20 | 20356386 | T | C | 0.2548 | -0.0212 | 0.0027 | 8.78E-15 | 0.000171 | 61.7  |
| rs6082354  | 20 | 21217976 | C | A | 0.3333 | -0.0425 | 0.0025 | 5.30E-63 | 0.000803 | 289.0 |
| rs6060043  | 20 | 33364584 | T | C | 0.1838 | 0.0273  | 0.0031 | 9.67E-19 | 0.000224 | 77.6  |
| rs1744769  | 20 | 35769592 | C | T | 0.1900 | 0.0178  | 0.0031 | 7.95E-09 | 0.000098 | 33.0  |
| rs2207132  | 20 | 39142516 | A | G | 0.0329 | -0.0440 | 0.0068 | 7.09E-11 | 0.000123 | 41.9  |
| rs1997833  | 20 | 39690342 | C | T | 0.2997 | 0.0166  | 0.0027 | 1.40E-09 | 0.000116 | 37.8  |
| rs17265513 | 20 | 39832628 | C | T | 0.1993 | -0.0211 | 0.0030 | 3.45E-12 | 0.000142 | 49.5  |
| rs56344540 | 20 | 49194444 | T | C | 0.0821 | -0.0397 | 0.0044 | 2.46E-19 | 0.000238 | 81.4  |
| rs61652170 | 20 | 54813718 | A | C | 0.1953 | 0.0169  | 0.0030 | 1.92E-08 | 0.000090 | 31.7  |
| rs34340379 | 20 | 54850686 | G | T | 0.2224 | 0.0204  | 0.0029 | 1.01E-12 | 0.000144 | 49.5  |
| rs76602912 | 20 | 57459868 | C | T | 0.0236 | -0.0593 | 0.0080 | 9.11E-14 | 0.000162 | 54.9  |
| rs2738787  | 20 | 62328375 | G | A | 0.0822 | -0.0349 | 0.0044 | 1.94E-15 | 0.000184 | 62.9  |
| rs8121509  | 20 | 62712053 | C | T | 0.4523 | 0.0252  | 0.0024 | 7.42E-26 | 0.000315 | 110.3 |
| rs2254446  | 21 | 37378153 | C | T | 0.2723 | 0.0412  | 0.0027 | 7.54E-53 | 0.000673 | 232.8 |
| rs11088472 | 21 | 40699376 | C | A | 0.4299 | 0.0186  | 0.0024 | 1.26E-14 | 0.000170 | 60.1  |
| rs469390   | 21 | 42817930 | A | G | 0.3897 | 0.0134  | 0.0024 | 4.53E-08 | 0.000085 | 31.2  |
| rs1006771  | 22 | 24314006 | T | G | 0.3561 | -0.0180 | 0.0025 | 5.59E-13 | 0.000149 | 51.8  |
| rs3178915  | 22 | 29453027 | G | A | 0.4808 | -0.0149 | 0.0024 | 3.65E-10 | 0.000111 | 38.5  |
| rs16989528 | 22 | 32217539 | T | C | 0.0315 | 0.0429  | 0.0071 | 1.37E-09 | 0.000112 | 36.5  |
| rs6000004  | 22 | 36180535 | G | A | 0.1371 | 0.0264  | 0.0034 | 1.84E-14 | 0.000165 | 60.3  |
| rs138703   | 22 | 39132748 | A | G | 0.3469 | -0.0275 | 0.0025 | 4.39E-28 | 0.000343 | 121.0 |
| rs202659   | 22 | 41811620 | C | T | 0.2209 | 0.0295  | 0.0029 | 1.01E-24 | 0.000300 | 103.5 |

**Abbreviations:** EA, effect allele; MAF, minor allele frequency; OA other allele; SNP, single nucleotide polymorphism; VR, variance explained.

**Supplementary Table 2 Genetic instruments and their associations with migraine**

| SNP        | CHR | POS       | EA | OA | The FinnGen study |        |         | Choquet et al 2021 |        |         |
|------------|-----|-----------|----|----|-------------------|--------|---------|--------------------|--------|---------|
|            |     |           |    |    | Beta              | se     | p value | Beta               | se     | p value |
| rs2460002  | 1   | 2119833   | G  | A  | -0.0287           | 0.0159 | 0.0703  | -0.0114            | 0.0114 | 0.3204  |
| rs17393144 | 1   | 9210262   | A  | G  | -0.0168           | 0.0166 | 0.3120  | -0.0265            | 0.0098 | 0.0070  |
| rs12375    | 1   | 10596341  | T  | C  | 0.0136            | 0.0159 | 0.3920  | -0.0082            | 0.0095 | 0.3856  |
| rs17367504 | 1   | 11862778  | G  | A  | -0.0304           | 0.0213 | 0.1530  | -0.0023            | 0.0122 | 0.8505  |
| rs76240114 | 1   | 16126026  | C  | A  | 0.0140            | 0.0198 | 0.4800  | -0.0149            | 0.0125 | 0.2319  |
| rs1497406  | 1   | 16505320  | G  | A  | 0.0158            | 0.0161 | 0.3260  | 0.0052             | 0.0093 | 0.5763  |
| rs4654887  | 1   | 21234923  | T  | C  | -0.0123           | 0.0152 | 0.4170  | -0.0142            | 0.0092 | 0.1236  |
| rs3218211  | 1   | 23835794  | G  | A  | 0.0276            | 0.0152 | 0.0690  | 0.0178             | 0.0088 | 0.0423  |
| rs17163588 | 1   | 26450009  | T  | C  | -0.0154           | 0.0208 | 0.4580  | 0.0050             | 0.0116 | 0.6661  |
| rs74465889 | 1   | 27209439  | G  | A  | 0.0094            | 0.0207 | 0.6510  | 0.0201             | 0.0122 | 0.0999  |
| rs556408   | 1   | 29166323  | A  | C  | 0.0059            | 0.0224 | 0.7940  | -0.0023            | 0.0127 | 0.8565  |
| rs2294814  | 1   | 40319587  | C  | A  | -0.0031           | 0.0150 | 0.8370  | 0.0093             | 0.0088 | 0.2911  |
| rs1740610  | 1   | 41502680  | A  | C  | -0.0209           | 0.0181 | 0.2490  | 0.0122             | 0.0109 | 0.2620  |
| rs660899   | 1   | 44117006  | T  | G  | 0.0147            | 0.0156 | 0.3470  | 0.0194             | 0.0093 | 0.0376  |
| rs2108202  | 1   | 44395786  | T  | C  | -0.0118           | 0.0176 | 0.5010  | 0.0084             | 0.0107 | 0.4322  |
| rs11208557 | 1   | 65423071  | C  | T  | 0.0167            | 0.0171 | 0.3290  | -0.0108            | 0.0130 | 0.4079  |
| rs1171265  | 1   | 66003252  | G  | A  | -0.0343           | 0.0150 | 0.0223  | -0.0142            | 0.0092 | 0.1242  |
| rs12031253 | 1   | 68676649  | G  | A  | -0.0325           | 0.0206 | 0.1140  | -0.0190            | 0.0113 | 0.0937  |
| rs12239520 | 1   | 91502560  | C  | T  | 0.0141            | 0.0233 | 0.5440  | -0.0093            | 0.0131 | 0.4748  |
| rs165316   | 1   | 91533297  | G  | A  | 0.0304            | 0.0183 | 0.0964  | 0.0108             | 0.0112 | 0.3328  |
| rs983040   | 1   | 91623097  | T  | C  | -0.0111           | 0.0165 | 0.4990  | -0.0011            | 0.0096 | 0.9086  |
| rs10874746 | 1   | 93323971  | C  | T  | 0.0111            | 0.0156 | 0.4790  | -0.0093            | 0.0094 | 0.3182  |
| rs599839   | 1   | 109822166 | A  | G  | 0.0202            | 0.0182 | 0.2660  | 0.0205             | 0.0108 | 0.0581  |
| rs78844054 | 1   | 153770361 | A  | G  | -0.0682           | 0.0549 | 0.2140  | 0.0120             | 0.0213 | 0.5717  |
| rs9427104  | 1   | 154589232 | T  | C  | 0.0069            | 0.0150 | 0.6480  | 0.0031             | 0.0089 | 0.7273  |
| rs7535144  | 1   | 154965113 | T  | G  | -0.0322           | 0.0564 | 0.5680  | 0.0434             | 0.0242 | 0.0726  |
| rs77369503 | 1   | 163027266 | A  | G  | -0.0019           | 0.0613 | 0.9750  | 0.0130             | 0.0266 | 0.6252  |
| rs2072758  | 1   | 174525917 | T  | C  | -0.0869           | 0.0273 | 0.0015  | -0.0225            | 0.0140 | 0.1098  |
| rs10913189 | 1   | 176473979 | C  | T  | 0.0083            | 0.0448 | 0.8530  | 0.0103             | 0.0176 | 0.5573  |
| rs77281709 | 1   | 176501831 | T  | C  | -0.0117           | 0.0329 | 0.7230  | -0.0024            | 0.0220 | 0.9130  |
| rs11806613 | 1   | 176535138 | G  | A  | -0.0192           | 0.0205 | 0.3470  | -0.0032            | 0.0121 | 0.7914  |
| rs6425558  | 1   | 179417347 | T  | C  | 0.0296            | 0.0181 | 0.1030  | 0.0033             | 0.0110 | 0.7639  |
| rs2298083  | 1   | 183515428 | A  | G  | -0.0583           | 0.0240 | 0.0153  | -0.0094            | 0.0135 | 0.4849  |
| rs708725   | 1   | 205744138 | T  | G  | 0.0033            | 0.0151 | 0.8250  | 0.0069             | 0.0090 | 0.4460  |
| rs2488249  | 1   | 208000018 | C  | T  | 0.0001            | 0.0164 | 0.9950  | -0.0102            | 0.0096 | 0.2882  |
| rs3958509  | 1   | 208301738 | C  | T  | NA                | NA     | NA      | 0.0184             | 0.0089 | 0.0380  |
| rs1223801  | 1   | 214348141 | A  | G  | -0.0211           | 0.0200 | 0.2900  | -0.0210            | 0.0120 | 0.0795  |
| rs78783655 | 1   | 220865963 | C  | T  | -0.0088           | 0.0413 | 0.8320  | 0.0126             | 0.0222 | 0.5689  |
| rs61830291 | 1   | 221001142 | C  | A  | -0.0037           | 0.0235 | 0.8770  | -0.0075            | 0.0156 | 0.6286  |
| rs12141189 | 1   | 221053545 | C  | T  | 0.0154            | 0.0163 | 0.3440  | 0.0009             | 0.0109 | 0.9341  |
| rs6663896  | 1   | 221668517 | C  | T  | 0.0019            | 0.0163 | 0.9080  | -0.0018            | 0.0089 | 0.8399  |
| rs708108   | 1   | 228189855 | C  | T  | 0.0004            | 0.0165 | 0.9790  | 0.0085             | 0.0092 | 0.3560  |
| rs526936   | 1   | 234852204 | A  | G  | 0.0084            | 0.0150 | 0.5790  | -0.0043            | 0.0089 | 0.6275  |
| rs2802954  | 1   | 235015126 | C  | A  | -0.0056           | 0.0155 | 0.7210  | -0.0104            | 0.0100 | 0.3004  |
| rs9782883  | 1   | 243892532 | G  | A  | 0.0069            | 0.0179 | 0.7000  | 0.0109             | 0.0113 | 0.3310  |
| rs12623864 | 2   | 6421045   | A  | G  | -0.0050           | 0.0150 | 0.7410  | -0.0048            | 0.0087 | 0.5812  |
| rs13405775 | 2   | 26026986  | T  | C  | 0.0009            | 0.0179 | 0.9600  | 0.0151             | 0.0094 | 0.1098  |
| rs28489942 | 2   | 27368588  | C  | T  | -0.0134           | 0.0174 | 0.4390  | -0.0056            | 0.0095 | 0.5539  |
| rs1260326  | 2   | 27730940  | C  | T  | -0.0254           | 0.0157 | 0.1060  | -0.0238            | 0.0090 | 0.0083  |
| rs6745881  | 2   | 40616451  | T  | C  | 0.0283            | 0.0154 | 0.0661  | -0.0110            | 0.0094 | 0.2424  |
| rs222471   | 2   | 42638057  | C  | T  | -0.0008           | 0.0220 | 0.9700  | -0.0032            | 0.0139 | 0.8173  |
| rs3791679  | 2   | 56096892  | G  | A  | -0.0042           | 0.0180 | 0.8140  | -0.0111            | 0.0106 | 0.2949  |
| rs6756943  | 2   | 64926764  | A  | G  | -0.0307           | 0.0176 | 0.0815  | -0.0058            | 0.0097 | 0.5478  |
| rs11545482 | 2   | 70315987  | T  | C  | 0.0902            | 0.1063 | 0.3960  | NA                 | NA     | NA      |
| rs72841131 | 2   | 70414741  | C  | T  | -0.0232           | 0.0249 | 0.3530  | -0.0026            | 0.0180 | 0.8853  |
| rs4852953  | 2   | 73869908  | A  | G  | NA                | NA     | NA      | -0.0079            | 0.0093 | 0.3918  |
| rs17041868 | 2   | 111894720 | C  | T  | 0.0199            | 0.0376 | 0.5960  | -0.0183            | 0.0179 | 0.3065  |
| rs4849181  | 2   | 113991970 | G  | A  | -0.0301           | 0.0152 | 0.0472  | -0.0086            | 0.0092 | 0.3492  |
| rs17050272 | 2   | 121306440 | A  | G  | -0.0159           | 0.0151 | 0.2930  | 0.0015             | 0.0091 | 0.8691  |
| rs17400325 | 2   | 178565913 | C  | T  | 0.1296            | 0.0540 | 0.0163  | 0.0441             | 0.0221 | 0.0463  |
| rs3731696  | 2   | 203431804 | G  | A  | 0.0522            | 0.0228 | 0.0221  | -0.0102            | 0.0136 | 0.4546  |

|            |   |           |   |   |         |        |        |         |        |        |
|------------|---|-----------|---|---|---------|--------|--------|---------|--------|--------|
| rs7607369  | 2 | 219279097 | G | A | -0.0054 | 0.0152 | 0.7220 | 0.0057  | 0.0090 | 0.5266 |
| rs3738951  | 2 | 225368321 | G | A | 0.0038  | 0.0150 | 0.8020 | -0.0200 | 0.0088 | 0.0238 |
| rs17323117 | 2 | 230162971 | G | A | -0.0049 | 0.0262 | 0.8510 | 0.0061  | 0.0168 | 0.7172 |
| rs7590861  | 2 | 231034785 | C | A | -0.0059 | 0.0165 | 0.7210 | 0.0013  | 0.0096 | 0.8923 |
| rs3771576  | 2 | 242388550 | C | T | -0.0008 | 0.0176 | 0.9630 | -0.0145 | 0.0106 | 0.1715 |
| rs7625680  | 3 | 11378069  | A | G | 0.0141  | 0.0152 | 0.3510 | 0.0173  | 0.0092 | 0.0597 |
| rs4684859  | 3 | 12498401  | A | G | 0.0242  | 0.0150 | 0.1070 | -0.0088 | 0.0090 | 0.3281 |
| rs9854148  | 3 | 23331350  | A | G | 0.0156  | 0.0169 | 0.3550 | 0.0019  | 0.0092 | 0.8369 |
| rs4678732  | 3 | 33212485  | A | G | -0.0118 | 0.0155 | 0.4450 | 0.0093  | 0.0091 | 0.3116 |
| rs11928797 | 3 | 33457493  | A | C | 0.0068  | 0.0231 | 0.7700 | 0.0019  | 0.0144 | 0.8952 |
| rs13067987 | 3 | 42651209  | T | C | -0.0143 | 0.0247 | 0.5620 | -0.0197 | 0.0143 | 0.1686 |
| rs4082155  | 3 | 47125385  | A | G | -0.0067 | 0.0153 | 0.6640 | -0.0121 | 0.0089 | 0.1734 |
| rs9825535  | 3 | 50772664  | T | C | -0.0040 | 0.0211 | 0.8490 | 0.0055  | 0.0120 | 0.6464 |
| rs4681968  | 3 | 57328867  | T | G | -0.0068 | 0.0194 | 0.7280 | -0.0035 | 0.0113 | 0.7571 |
| rs9310077  | 3 | 88196644  | G | A | 0.0087  | 0.0196 | 0.6580 | -0.0242 | 0.0121 | 0.0452 |
| rs3772102  | 3 | 98502628  | G | T | -0.0006 | 0.0151 | 0.9680 | -0.0156 | 0.0089 | 0.0802 |
| rs13088318 | 3 | 101242751 | G | A | 0.0085  | 0.0155 | 0.5810 | 0.0051  | 0.0096 | 0.5962 |
| rs75592719 | 3 | 101667708 | A | G | 0.0782  | 0.0512 | 0.1270 | -0.0379 | 0.0210 | 0.0714 |
| rs9288851  | 3 | 107316938 | G | A | -0.0061 | 0.0215 | 0.7770 | 0.0221  | 0.0119 | 0.0628 |
| rs4678144  | 3 | 124404399 | G | A | 0.0160  | 0.0203 | 0.4290 | 0.0277  | 0.0109 | 0.0110 |
| rs645040   | 3 | 135926622 | T | G | -0.0051 | 0.0212 | 0.8090 | -0.0017 | 0.0105 | 0.8710 |
| rs1199333  | 3 | 138091701 | T | G | 0.0085  | 0.0183 | 0.6400 | 0.0244  | 0.0115 | 0.0342 |
| rs55752389 | 3 | 138848513 | T | C | 0.0044  | 0.0164 | 0.7880 | -0.0071 | 0.0099 | 0.4736 |
| rs6763931  | 3 | 141102833 | A | G | 0.0185  | 0.0150 | 0.2190 | -0.0078 | 0.0089 | 0.3799 |
| rs6799078  | 3 | 141630722 | G | A | 0.0213  | 0.0152 | 0.1620 | 0.0043  | 0.0091 | 0.6379 |
| rs73238159 | 3 | 142078759 | T | C | -0.0492 | 0.0216 | 0.0228 | -0.0102 | 0.0134 | 0.4503 |
| rs5398     | 3 | 170715830 | A | G | 0.0223  | 0.0170 | 0.1900 | -0.0084 | 0.0097 | 0.3865 |
| rs572169   | 3 | 172165727 | T | C | 0.0045  | 0.0159 | 0.7770 | 0.0051  | 0.0095 | 0.5906 |
| rs7614305  | 3 | 178912661 | A | G | -0.0308 | 0.0199 | 0.1220 | -0.0060 | 0.0112 | 0.5902 |
| rs2193587  | 3 | 185990096 | T | C | -0.0073 | 0.0190 | 0.7030 | 0.0063  | 0.0107 | 0.5562 |
| rs4452320  | 3 | 186381717 | G | A | NA      | NA     | NA     | -0.0180 | 0.0101 | 0.0751 |
| rs3748034  | 4 | 3446091   | T | G | 0.0485  | 0.0226 | 0.0321 | 0.0076  | 0.0152 | 0.6173 |
| rs4234798  | 4 | 7219933   | G | T | -0.0324 | 0.0154 | 0.0357 | -0.0117 | 0.0096 | 0.2254 |
| rs9991733  | 4 | 39420994  | G | A | 0.0211  | 0.0165 | 0.2010 | 0.0021  | 0.0100 | 0.8331 |
| rs3912391  | 4 | 39698824  | A | G | -0.0055 | 0.0152 | 0.7170 | 0.0034  | 0.0086 | 0.6937 |
| rs28551714 | 4 | 45131089  | A | G | 0.0090  | 0.0170 | 0.5970 | 0.0055  | 0.0108 | 0.6121 |
| rs3775288  | 4 | 46391821  | G | A | NA      | NA     | NA     | -0.0402 | 0.0146 | 0.0059 |
| rs976002   | 4 | 69343287  | G | A | -0.0277 | 0.0176 | 0.1150 | -0.0126 | 0.0103 | 0.2222 |
| rs1902023  | 4 | 69536084  | C | A | 0.0105  | 0.0150 | 0.4870 | 0.0073  | 0.0091 | 0.4246 |
| rs897945   | 4 | 83838262  | T | G | 0.0008  | 0.0153 | 0.9590 | 0.0034  | 0.0089 | 0.7045 |
| rs2280099  | 4 | 90035549  | G | A | -0.0133 | 0.0202 | 0.5110 | -0.0349 | 0.0117 | 0.0029 |
| rs1444922  | 4 | 95912221  | G | A | -0.0063 | 0.0150 | 0.6760 | -0.0103 | 0.0090 | 0.2557 |
| rs4306959  | 4 | 97584985  | G | A | 0.0042  | 0.0155 | 0.7840 | 0.0173  | 0.0088 | 0.0497 |
| rs1126673  | 4 | 100045616 | T | C | 0.0056  | 0.0163 | 0.7300 | 0.0117  | 0.0097 | 0.2281 |
| rs1229984  | 4 | 100239319 | C | T | -0.0637 | 0.1056 | 0.5470 | -0.0520 | 0.0217 | 0.0164 |
| rs28590233 | 4 | 106011086 | T | C | 0.0040  | 0.0197 | 0.8380 | -0.0269 | 0.0114 | 0.0185 |
| rs2667172  | 4 | 121749030 | C | T | -0.0136 | 0.0169 | 0.4220 | 0.0013  | 0.0091 | 0.8862 |
| rs58148580 | 4 | 124758773 | T | C | -0.0031 | 0.0237 | 0.8950 | -0.0043 | 0.0144 | 0.7641 |
| rs6534673  | 4 | 129142166 | T | C | 0.0044  | 0.0155 | 0.7740 | -0.0012 | 0.0096 | 0.9005 |
| rs1492820  | 4 | 145650021 | A | G | 0.0158  | 0.0153 | 0.3020 | -0.0002 | 0.0071 | 0.9774 |
| rs7697204  | 4 | 148980174 | T | C | -0.0519 | 0.0173 | 0.0027 | 0.0095  | 0.0101 | 0.3493 |
| rs17540470 | 4 | 169349568 | T | C | 0.0117  | 0.0170 | 0.4910 | -0.0087 | 0.0117 | 0.4562 |
| rs13184788 | 5 | 39075388  | T | C | -0.0091 | 0.0150 | 0.5450 | -0.0065 | 0.0086 | 0.4460 |
| rs62372052 | 5 | 42724294  | G | A | 0.0368  | 0.0227 | 0.1040 | 0.0099  | 0.0146 | 0.4998 |
| rs7723160  | 5 | 42860681  | G | A | -0.0255 | 0.0169 | 0.1300 | -0.0104 | 0.0102 | 0.3099 |
| rs13174925 | 5 | 44124113  | C | A | 0.0033  | 0.0167 | 0.8460 | 0.0212  | 0.0097 | 0.0297 |
| rs271234   | 5 | 53075037  | A | G | 0.0048  | 0.0206 | 0.8170 | -0.0021 | 0.0124 | 0.8657 |
| rs76026733 | 5 | 53263963  | C | T | 0.0488  | 0.0411 | 0.2350 | -0.0073 | 0.0208 | 0.7252 |
| rs7736186  | 5 | 58270494  | T | C | 0.0612  | 0.1062 | 0.5650 | -0.0078 | 0.0279 | 0.7790 |
| rs11738977 | 5 | 59018442  | G | A | 0.0185  | 0.0175 | 0.2910 | 0.0052  | 0.0095 | 0.5843 |
| rs13162864 | 5 | 59207614  | C | A | -0.0363 | 0.0240 | 0.1300 | 0.0013  | 0.0135 | 0.9232 |
| rs185077   | 5 | 78331823  | C | T | 0.0180  | 0.0150 | 0.2310 | 0.0070  | 0.0088 | 0.4294 |
| rs1350437  | 5 | 87192117  | T | G | 0.0378  | 0.0199 | 0.0575 | -0.0038 | 0.0104 | 0.7138 |
| rs9293511  | 5 | 88416354  | T | C | -0.0022 | 0.0161 | 0.8930 | 0.0053  | 0.0090 | 0.5562 |

|             |   |           |   |   |         |        |        |         |        |        |
|-------------|---|-----------|---|---|---------|--------|--------|---------|--------|--------|
| rs10515337  | 5 | 102301368 | C | T | -0.0410 | 0.0159 | 0.0098 | -0.0169 | 0.0096 | 0.0773 |
| rs4705873   | 5 | 132267167 | A | G | 0.0103  | 0.0218 | 0.6350 | -0.0317 | 0.0122 | 0.0093 |
| rs35096828  | 5 | 133897439 | C | T | -0.0115 | 0.0171 | 0.4990 | -0.0171 | 0.0100 | 0.0878 |
| rs609385    | 5 | 134597267 | T | C | 0.0012  | 0.0152 | 0.9350 | -0.0007 | 0.0091 | 0.9385 |
| rs757647    | 5 | 137707315 | A | G | -0.0113 | 0.0176 | 0.5230 | 0.0188  | 0.0106 | 0.0749 |
| rs258775    | 5 | 142564823 | C | A | -0.0140 | 0.0198 | 0.4790 | 0.0007  | 0.0116 | 0.9517 |
| rs17413389  | 5 | 143078627 | G | T | 0.0146  | 0.0195 | 0.4530 | 0.0124  | 0.0100 | 0.2150 |
| rs4282339   | 5 | 168256240 | A | G | 0.0077  | 0.0191 | 0.6870 | -0.0164 | 0.0109 | 0.1329 |
| rs17714046  | 5 | 180661980 | C | T | -0.0358 | 0.0278 | 0.1990 | NA      | NA     | NA     |
| rs9502597   | 6 | 7307699   | C | T | -0.0059 | 0.0189 | 0.7530 | 0.0078  | 0.0110 | 0.4812 |
| rs2296198   | 6 | 18399750  | C | T | 0.0228  | 0.0199 | 0.2530 | 0.0206  | 0.0101 | 0.0419 |
| rs12210951  | 6 | 21936868  | G | A | -0.0198 | 0.0167 | 0.2380 | -0.0072 | 0.0100 | 0.4719 |
| rs7742369   | 6 | 34165721  | G | A | 0.0190  | 0.0212 | 0.3710 | 0.0104  | 0.0115 | 0.3622 |
| rs1929849   | 6 | 35205541  | C | T | 0.0110  | 0.0223 | 0.6220 | -0.0154 | 0.0119 | 0.1939 |
| rs2235711   | 6 | 38148770  | T | C | 0.0070  | 0.0157 | 0.6560 | 0.0004  | 0.0105 | 0.9695 |
| rs9471969   | 6 | 42906384  | T | G | -0.0024 | 0.0195 | 0.9020 | 0.0084  | 0.0103 | 0.4162 |
| rs6905288   | 6 | 43758873  | A | G | -0.0246 | 0.0152 | 0.1060 | -0.0046 | 0.0106 | 0.6641 |
| rs4715332   | 6 | 52669185  | A | C | 0.0056  | 0.0151 | 0.7100 | 0.0168  | 0.0090 | 0.0632 |
| rs9352613   | 6 | 79424433  | G | A | 0.0094  | 0.0157 | 0.5500 | 0.0116  | 0.0092 | 0.2075 |
| rs6934603   | 6 | 87994015  | G | A | -0.0061 | 0.0150 | 0.6860 | 0.0313  | 0.0088 | 0.0004 |
| rs499624    | 6 | 100087783 | T | G | -0.0074 | 0.0163 | 0.6510 | -0.0084 | 0.0095 | 0.3752 |
| rs7759938   | 6 | 105378954 | T | C | 0.0147  | 0.0162 | 0.3630 | 0.0129  | 0.0094 | 0.1716 |
| rs2153960   | 6 | 108988184 | A | G | -0.0203 | 0.0155 | 0.1920 | -0.0140 | 0.0097 | 0.1489 |
| rs1361108   | 6 | 126767600 | T | C | -0.0069 | 0.0150 | 0.6460 | -0.0182 | 0.0089 | 0.0416 |
| rs72961013  | 6 | 127529780 | A | G | 0.0182  | 0.0304 | 0.5500 | 0.0175  | 0.0186 | 0.3443 |
| rs4421216   | 6 | 128365434 | G | A | 0.0246  | 0.0191 | 0.1980 | -0.0187 | 0.0116 | 0.1070 |
| rs4895842   | 6 | 129349539 | C | T | 0.0208  | 0.0167 | 0.2120 | 0.0042  | 0.0095 | 0.6579 |
| rs9388768   | 6 | 130374102 | A | C | 0.0047  | 0.0159 | 0.7680 | -0.0173 | 0.0094 | 0.0653 |
| rs9390459   | 6 | 147680359 | G | A | 0.0228  | 0.0150 | 0.1280 | 0.0035  | 0.0123 | 0.7758 |
| rs2234693   | 6 | 152163335 | C | T | -0.0068 | 0.0152 | 0.6540 | -0.0012 | 0.0088 | 0.8916 |
| rs674882    | 6 | 153407553 | C | T | 0.0266  | 0.0150 | 0.0766 | 0.0210  | 0.0089 | 0.0189 |
| rs677830    | 6 | 154428666 | T | C | -0.0117 | 0.0187 | 0.5320 | 0.0198  | 0.0103 | 0.0542 |
| rs927450    | 6 | 160182096 | G | A | 0.0078  | 0.0152 | 0.6050 | -0.0108 | 0.0090 | 0.2296 |
| rs7750288   | 6 | 160400147 | G | A | -0.0098 | 0.0168 | 0.5620 | -0.0012 | 0.0099 | 0.9036 |
| rs555754    | 6 | 160769423 | A | G | -0.0062 | 0.0150 | 0.6780 | 0.0227  | 0.0088 | 0.0101 |
| rs504371    | 6 | 165724052 | A | C | 0.0159  | 0.0151 | 0.2910 | 0.0131  | 0.0093 | 0.1598 |
| rs3008049   | 6 | 166063617 | G | A | 0.0221  | 0.0172 | 0.2000 | 0.0063  | 0.0096 | 0.5150 |
| rs9295315   | 6 | 166254991 | A | G | 0.0259  | 0.0158 | 0.1020 | 0.0089  | 0.0104 | 0.3937 |
| rs2323034   | 6 | 166306809 | A | G | -0.0378 | 0.0151 | 0.0125 | 0.0085  | 0.0088 | 0.3373 |
| rs7802508   | 7 | 1191689   | A | G | -0.0123 | 0.0151 | 0.4150 | 0.0054  | 0.0107 | 0.6137 |
| rs3889797   | 7 | 1877924   | C | A | -0.0047 | 0.0151 | 0.7530 | 0.0078  | 0.0095 | 0.4122 |
| rs2533879   | 7 | 2859847   | A | G | -0.0299 | 0.0156 | 0.0558 | -0.0013 | 0.0094 | 0.8903 |
| rs62439737  | 7 | 6779810   | G | A | -0.0083 | 0.0208 | 0.6920 | -0.0085 | 0.0127 | 0.5012 |
| rs6969690   | 7 | 14214561  | G | T | 0.0486  | 0.0164 | 0.0030 | 0.0023  | 0.0110 | 0.8339 |
| rs11761979  | 7 | 31018138  | A | C | 0.0056  | 0.0172 | 0.7440 | -0.0084 | 0.0106 | 0.4279 |
| rs2228078   | 7 | 31018852  | C | T | 0.0327  | 0.0709 | 0.6450 | -0.0348 | 0.0381 | 0.3605 |
| rs62467370  | 7 | 32929628  | A | C | -0.0064 | 0.0284 | 0.8200 | -0.0326 | 0.0193 | 0.0917 |
| rs62460537  | 7 | 44936916  | G | A | -0.0120 | 0.0454 | 0.7910 | -0.0388 | 0.0178 | 0.0291 |
| rs6958337   | 7 | 45764528  | C | T | -0.0095 | 0.0247 | 0.7010 | 0.0134  | 0.0164 | 0.4132 |
| rs74516857  | 7 | 45907939  | A | G | 0.0133  | 0.0280 | 0.6340 | -0.0011 | 0.0182 | 0.9517 |
| rs11977526  | 7 | 46008110  | A | G | 0.0193  | 0.0161 | 0.2290 | 0.0166  | 0.0090 | 0.0666 |
| rs116945878 | 7 | 46276386  | T | C | 0.0302  | 0.0351 | 0.3900 | NA      | NA     | NA     |
| rs78546112  | 7 | 46329630  | T | C | 0.0897  | 0.0346 | 0.0096 | 0.0353  | 0.0183 | 0.0535 |
| rs11979093  | 7 | 46501098  | A | G | -0.0190 | 0.0231 | 0.4110 | -0.0210 | 0.0120 | 0.0808 |
| rs71545944  | 7 | 46659170  | G | A | -0.1710 | 0.0835 | 0.0404 | -0.0147 | 0.0335 | 0.6608 |
| rs117890478 | 7 | 46713054  | G | T | -0.0277 | 0.0834 | 0.7400 | NA      | NA     | NA     |
| rs35640690  | 7 | 46719105  | C | T | -0.0048 | 0.0194 | 0.8040 | -0.0023 | 0.0108 | 0.8307 |
| rs11762356  | 7 | 46956047  | G | A | 0.0314  | 0.0493 | 0.5230 | 0.0156  | 0.0300 | 0.6030 |
| rs7790734   | 7 | 46970040  | A | G | 0.0088  | 0.0159 | 0.5800 | 0.0138  | 0.0097 | 0.1556 |
| rs2174460   | 7 | 55991292  | A | G | -0.0026 | 0.0182 | 0.8860 | 0.0016  | 0.0107 | 0.8807 |
| rs13233571  | 7 | 72971231  | T | C | -0.0202 | 0.0226 | 0.3720 | -0.0638 | 0.0140 | 0.0000 |
| rs799157    | 7 | 73020301  | C | T | -0.0585 | 0.0494 | 0.2360 | -0.0559 | 0.0221 | 0.0115 |
| rs2527886   | 7 | 99552168  | C | T | -0.0113 | 0.0153 | 0.4580 | -0.0002 | 0.0084 | 0.9810 |
| rs13246732  | 7 | 113775765 | T | C | -0.0103 | 0.0160 | 0.5170 | -0.0141 | 0.0098 | 0.1491 |

|             |    |           |   |   |         |        |        |         |        |        |
|-------------|----|-----------|---|---|---------|--------|--------|---------|--------|--------|
| rs11556924  | 7  | 129663496 | T | C | 0.0052  | 0.0160 | 0.7470 | -0.0070 | 0.0092 | 0.4475 |
| rs157934    | 7  | 130585492 | C | T | -0.0220 | 0.0153 | 0.1510 | -0.0096 | 0.0096 | 0.3165 |
| rs2048672   | 7  | 130653851 | A | C | 0.0022  | 0.0153 | 0.8870 | -0.0056 | 0.0097 | 0.5627 |
| rs273957    | 7  | 137600690 | T | C | -0.0326 | 0.0152 | 0.0322 | -0.0080 | 0.0091 | 0.3789 |
| rs7811152   | 7  | 138238844 | A | G | 0.0000  | 0.0154 | 0.9990 | -0.0003 | 0.0086 | 0.9721 |
| rs3857873   | 7  | 138721901 | T | C | -0.0066 | 0.0150 | 0.6620 | 0.0055  | 0.0088 | 0.5331 |
| rs7789908   | 7  | 150530196 | G | T | 0.0256  | 0.0177 | 0.1500 | -0.0148 | 0.0111 | 0.1810 |
| rs6982207   | 8  | 5551845   | A | G | 0.0260  | 0.0210 | 0.2160 | -0.0062 | 0.0105 | 0.5541 |
| rs9657541   | 8  | 10643164  | T | C | -0.0077 | 0.0207 | 0.7090 | -0.0093 | 0.0111 | 0.4015 |
| rs76393968  | 8  | 16282937  | A | G | -0.2418 | 0.1210 | 0.0457 | 0.0049  | 0.0336 | 0.8842 |
| rs1495741   | 8  | 18272881  | A | G | -0.0065 | 0.0173 | 0.7060 | 0.0012  | 0.0100 | 0.9041 |
| rs2081687   | 8  | 59388565  | C | T | 0.0219  | 0.0154 | 0.1550 | 0.0023  | 0.0093 | 0.8041 |
| rs1583164   | 8  | 77105970  | G | A | -0.0279 | 0.0152 | 0.0656 | 0.0097  | 0.0090 | 0.2848 |
| rs6473015   | 8  | 78178485  | C | A | -0.0078 | 0.0183 | 0.6690 | 0.0004  | 0.0108 | 0.9704 |
| rs445036    | 8  | 81408409  | C | T | -0.0077 | 0.0175 | 0.6600 | -0.0033 | 0.0096 | 0.7311 |
| rs1693551   | 8  | 101675584 | C | T | 0.0356  | 0.0152 | 0.0187 | 0.0287  | 0.0089 | 0.0012 |
| rs2514843   | 8  | 109063434 | T | C | -0.0005 | 0.0151 | 0.9720 | -0.0050 | 0.0088 | 0.5673 |
| rs2293889   | 8  | 116599199 | G | T | NA      | NA     | NA     | 0.0117  | 0.0090 | 0.1911 |
| rs6471133   | 8  | 134611160 | C | A | -0.0208 | 0.0190 | 0.2740 | 0.0127  | 0.0110 | 0.2475 |
| rs68013747  | 8  | 135656665 | A | G | 0.0157  | 0.0160 | 0.3240 | -0.0207 | 0.0096 | 0.0303 |
| rs11136336  | 8  | 145007187 | A | G | 0.0095  | 0.0153 | 0.5340 | 0.0053  | 0.0109 | 0.6290 |
| rs1270231   | 9  | 4840877   | A | G | -0.0110 | 0.0308 | 0.7220 | 0.0095  | 0.0140 | 0.4984 |
| rs75565599  | 9  | 4851008   | C | A | 0.0027  | 0.0381 | 0.9430 | 0.0221  | 0.0234 | 0.3463 |
| rs9969735   | 9  | 4888585   | A | C | -0.0132 | 0.0151 | 0.3820 | 0.0029  | 0.0090 | 0.7465 |
| rs72701684  | 9  | 5211191   | T | G | 0.0612  | 0.0421 | 0.1460 | 0.0060  | 0.0222 | 0.7876 |
| rs6475614   | 9  | 22153265  | C | T | 0.0118  | 0.0158 | 0.4540 | -0.0010 | 0.0100 | 0.9203 |
| rs56324928  | 9  | 33933136  | C | A | -0.0247 | 0.0194 | 0.2050 | -0.0048 | 0.0105 | 0.6472 |
| rs1367628   | 9  | 74069700  | T | G | 0.0022  | 0.0197 | 0.9130 | -0.0136 | 0.0111 | 0.2223 |
| rs4471123   | 9  | 86700737  | A | G | -0.0015 | 0.0150 | 0.9200 | 0.0066  | 0.0089 | 0.4599 |
| rs6559365   | 9  | 92209279  | A | G | 0.0262  | 0.0149 | 0.0791 | 0.0093  | 0.0087 | 0.2857 |
| rs9695734   | 9  | 96407983  | T | C | 0.0358  | 0.0229 | 0.1180 | 0.0145  | 0.0119 | 0.2219 |
| rs10512236  | 9  | 97630451  | T | G | 0.0094  | 0.0246 | 0.7010 | -0.0325 | 0.0189 | 0.0858 |
| rs4743034   | 9  | 109632353 | A | G | 0.0078  | 0.0182 | 0.6690 | 0.0193  | 0.0105 | 0.0651 |
| rs1981268   | 9  | 111637331 | A | C | -0.0087 | 0.0252 | 0.7310 | -0.0074 | 0.0136 | 0.5853 |
| rs28410315  | 9  | 119338898 | G | A | 0.0294  | 0.0215 | 0.1710 | 0.0400  | 0.0122 | 0.0011 |
| rs1129      | 9  | 128199873 | T | C | -0.0026 | 0.0155 | 0.8690 | 0.0103  | 0.0093 | 0.2660 |
| rs2810490   | 9  | 136923118 | A | G | 0.0118  | 0.0151 | 0.4330 | -0.0014 | 0.0116 | 0.9038 |
| rs1832007   | 10 | 5254847   | G | A | -0.0167 | 0.0216 | 0.4390 | -0.0203 | 0.0125 | 0.1046 |
| rs2277222   | 10 | 13494594  | C | T | 0.0212  | 0.0151 | 0.1590 | 0.0173  | 0.0095 | 0.0681 |
| rs12769257  | 10 | 21736100  | C | T | 0.0437  | 0.0196 | 0.0259 | 0.0338  | 0.0115 | 0.0032 |
| rs7899156   | 10 | 22822524  | A | C | -0.0229 | 0.0158 | 0.1460 | -0.0152 | 0.0093 | 0.1010 |
| rs2754369   | 10 | 38655478  | T | C | -0.0084 | 0.0192 | 0.6640 | 0.0111  | 0.0106 | 0.2923 |
| rs7072243   | 10 | 50319387  | A | G | -0.0211 | 0.0154 | 0.1710 | 0.0140  | 0.0090 | 0.1184 |
| rs293281    | 10 | 53217522  | A | G | -0.0159 | 0.0160 | 0.3190 | -0.0052 | 0.0097 | 0.5898 |
| rs1471246   | 10 | 62074139  | A | G | 0.0001  | 0.0151 | 0.9940 | 0.0041  | 0.0091 | 0.6531 |
| rs16926292  | 10 | 71149389  | C | T | -0.0091 | 0.0304 | 0.7650 | -0.0170 | 0.0144 | 0.2373 |
| rs7079868   | 10 | 72020703  | A | C | 0.0039  | 0.0307 | 0.8980 | 0.0164  | 0.0178 | 0.3587 |
| rs6480781   | 10 | 77140707  | T | G | -0.0191 | 0.0154 | 0.2150 | -0.0047 | 0.0090 | 0.6008 |
| rs2068888   | 10 | 94839642  | A | G | -0.0215 | 0.0150 | 0.1510 | 0.0085  | 0.0090 | 0.3445 |
| rs9630085   | 10 | 95333063  | G | A | 0.0001  | 0.0180 | 0.9980 | 0.0034  | 0.0110 | 0.7570 |
| rs116454156 | 10 | 95347041  | A | G | -0.0919 | 0.0677 | 0.1740 | NA      | NA     | NA     |
| rs2274223   | 10 | 96066341  | G | A | -0.0344 | 0.0180 | 0.0552 | -0.0423 | 0.0096 | 0.0000 |
| rs10509746  | 10 | 102656897 | C | T | -0.0322 | 0.0151 | 0.0329 | -0.0188 | 0.0090 | 0.0366 |
| rs11191424  | 10 | 104625886 | A | G | 0.0202  | 0.0160 | 0.2070 | 0.0289  | 0.0093 | 0.0018 |
| rs11197593  | 10 | 117982741 | C | T | 0.0204  | 0.0150 | 0.1730 | -0.0036 | 0.0090 | 0.6875 |
| rs6421044   | 11 | 1588110   | T | C | 0.0112  | 0.0155 | 0.4670 | 0.0239  | 0.0089 | 0.0072 |
| rs11042751  | 11 | 2149864   | C | T | -0.0285 | 0.0187 | 0.1270 | -0.0127 | 0.0126 | 0.3131 |
| rs1124699   | 11 | 2164990   | A | G | 0.0176  | 0.0312 | 0.5720 | 0.0135  | 0.0196 | 0.4915 |
| rs10834966  | 11 | 3749585   | C | A | 0.0112  | 0.0191 | 0.5590 | -0.0099 | 0.0112 | 0.3740 |
| rs12277932  | 11 | 8631669   | C | T | 0.0005  | 0.0150 | 0.9760 | 0.0002  | 0.0072 | 0.9779 |
| rs7947951   | 11 | 13356030  | G | A | 0.0069  | 0.0150 | 0.6470 | 0.0072  | 0.0095 | 0.4498 |
| rs72858774  | 11 | 15772442  | T | G | 0.0192  | 0.0281 | 0.4950 | NA      | NA     | NA     |
| rs10832918  | 11 | 18335684  | A | G | -0.0314 | 0.0151 | 0.0376 | 0.0088  | 0.0092 | 0.3393 |
| rs34452566  | 11 | 27793470  | T | G | -0.0113 | 0.0195 | 0.5620 | -0.0025 | 0.0111 | 0.8219 |



|             |    |           |   |   |         |        |        |         |        |        |
|-------------|----|-----------|---|---|---------|--------|--------|---------|--------|--------|
| rs12294104  | 11 | 30382899  | T | C | -0.0006 | 0.0196 | 0.9760 | -0.0007 | 0.0122 | 0.9541 |
| rs7120548   | 11 | 47662932  | C | T | -0.0080 | 0.0179 | 0.6540 | 0.0215  | 0.0096 | 0.0251 |
| rs2047812   | 11 | 48162042  | G | A | 0.0125  | 0.0190 | 0.5090 | -0.0082 | 0.0111 | 0.4596 |
| rs78089241  | 11 | 48214064  | G | A | -0.0580 | 0.0398 | 0.1450 | 0.0150  | 0.0260 | 0.5650 |
| rs538169    | 11 | 59503589  | C | T | 0.0438  | 0.0256 | 0.0873 | 0.0288  | 0.0184 | 0.1184 |
| rs174550    | 11 | 61571478  | C | T | -0.0141 | 0.0152 | 0.3540 | -0.0042 | 0.0093 | 0.6514 |
| rs4636677   | 11 | 65458994  | T | G | -0.0120 | 0.0225 | 0.5930 | -0.0345 | 0.0196 | 0.0781 |
| rs56088284  | 11 | 66899619  | G | A | 0.0133  | 0.0338 | 0.6950 | 0.0431  | 0.0166 | 0.0093 |
| rs4980661   | 11 | 69306579  | A | G | -0.0048 | 0.0153 | 0.7550 | 0.0094  | 0.0091 | 0.3041 |
| rs2450136   | 11 | 77925273  | G | T | 0.0130  | 0.0189 | 0.4900 | 0.0386  | 0.0115 | 0.0007 |
| rs61904289  | 11 | 85994731  | T | C | -0.0197 | 0.0154 | 0.1990 | 0.0012  | 0.0097 | 0.9013 |
| rs11020842  | 11 | 94317202  | A | G | 0.0532  | 0.0389 | 0.1710 | 0.0038  | 0.0263 | 0.8852 |
| rs11604671  | 11 | 113268059 | A | G | -0.0292 | 0.0150 | 0.0521 | -0.0019 | 0.0091 | 0.8336 |
| rs10892562  | 11 | 120221618 | G | A | -0.0019 | 0.0151 | 0.9020 | 0.0110  | 0.0090 | 0.2194 |
| rs10892919  | 11 | 122736571 | T | C | -0.0008 | 0.0151 | 0.9580 | -0.0034 | 0.0089 | 0.7006 |
| rs11220462  | 11 | 126243952 | A | G | -0.0142 | 0.0191 | 0.4570 | -0.0012 | 0.0133 | 0.9281 |
| rs2856321   | 12 | 11855773  | A | G | 0.0222  | 0.0154 | 0.1490 | 0.0275  | 0.0093 | 0.0029 |
| rs56234529  | 12 | 31638712  | T | C | 0.0073  | 0.0214 | 0.7320 | 0.0152  | 0.0115 | 0.1879 |
| rs6488006   | 12 | 31908357  | C | T | -0.0088 | 0.0218 | 0.6860 | -0.0323 | 0.0141 | 0.0221 |
| rs118047082 | 12 | 31946325  | T | C | 0.0434  | 0.0561 | 0.4400 | NA      | NA     | NA     |
| rs66550728  | 12 | 31948210  | G | A | -0.0180 | 0.0226 | 0.4280 | 0.0059  | 0.0128 | 0.6453 |
| rs1621686   | 12 | 32084875  | G | A | 0.0122  | 0.0162 | 0.4530 | 0.0037  | 0.0098 | 0.7054 |
| rs11519432  | 12 | 34675949  | T | C | -0.0145 | 0.0151 | 0.3380 | 0.0151  | 0.0091 | 0.0992 |
| rs6582708   | 12 | 38851355  | C | T | 0.0513  | 0.0474 | 0.2800 | 0.0267  | 0.0587 | 0.6486 |
| rs7306229   | 12 | 46334832  | T | C | -0.0007 | 0.0150 | 0.9650 | 0.0035  | 0.0088 | 0.6898 |
| rs705708    | 12 | 56488913  | A | G | -0.0168 | 0.0151 | 0.2680 | -0.0169 | 0.0089 | 0.0571 |
| rs2657879   | 12 | 56865338  | G | A | 0.0082  | 0.0194 | 0.6730 | -0.0141 | 0.0115 | 0.2199 |
| rs78607331  | 12 | 57648644  | T | C | 0.0143  | 0.0318 | 0.6530 | 0.0209  | 0.0232 | 0.3674 |
| rs812315    | 12 | 57993490  | A | G | -0.0198 | 0.0169 | 0.2400 | -0.0006 | 0.0097 | 0.9509 |
| rs1351394   | 12 | 66351826  | C | T | -0.0153 | 0.0150 | 0.3060 | 0.0061  | 0.0088 | 0.4892 |
| rs7306772   | 12 | 89914142  | G | T | 0.0276  | 0.0163 | 0.0900 | -0.0080 | 0.0098 | 0.4108 |
| rs2072593   | 12 | 93970026  | C | T | 0.0200  | 0.0162 | 0.2180 | -0.0124 | 0.0109 | 0.2576 |
| rs4144501   | 12 | 94156587  | A | G | -0.0279 | 0.0150 | 0.0624 | -0.0130 | 0.0089 | 0.1431 |
| rs10777858  | 12 | 97792745  | T | G | 0.0060  | 0.0151 | 0.6910 | 0.0148  | 0.0089 | 0.0953 |
| rs249624    | 12 | 98191847  | T | C | 0.0269  | 0.0238 | 0.2580 | -0.0184 | 0.0117 | 0.1153 |
| rs78597439  | 12 | 102716172 | T | C | 0.1191  | 0.0770 | 0.1220 | 0.0282  | 0.0322 | 0.3818 |
| rs11111274  | 12 | 102838128 | A | G | 0.0055  | 0.0161 | 0.7330 | 0.0120  | 0.0099 | 0.2248 |
| rs79218426  | 12 | 102889497 | T | C | 0.0156  | 0.0230 | 0.4980 | -0.0013 | 0.0218 | 0.9525 |
| rs10860878  | 12 | 102963550 | T | C | 0.0066  | 0.0151 | 0.6630 | 0.0207  | 0.0091 | 0.0228 |
| rs10745954  | 12 | 103483094 | G | A | 0.0073  | 0.0154 | 0.6360 | 0.0012  | 0.0085 | 0.8884 |
| rs7314285   | 12 | 111522026 | G | T | 0.0267  | 0.0373 | 0.4740 | 0.0156  | 0.0166 | 0.3471 |
| rs11067228  | 12 | 115094260 | G | A | 0.0076  | 0.0156 | 0.6260 | -0.0002 | 0.0084 | 0.9811 |
| rs2460488   | 12 | 116187660 | A | G | 0.0044  | 0.0199 | 0.8270 | 0.0059  | 0.0116 | 0.6128 |
| rs75938105  | 12 | 116261411 | T | C | -0.0096 | 0.0415 | 0.8180 | -0.0407 | 0.0251 | 0.1047 |
| rs7305618   | 12 | 121402932 | T | C | -0.0309 | 0.0182 | 0.0886 | -0.0017 | 0.0102 | 0.8680 |
| rs1800574   | 12 | 121416864 | T | C | 0.0242  | 0.0366 | 0.5080 | 0.0093  | 0.0269 | 0.7309 |
| rs11060762  | 12 | 123403710 | A | C | -0.0360 | 0.0280 | 0.2000 | 0.0207  | 0.0160 | 0.1964 |
| rs9578326   | 13 | 21487599  | T | G | -0.0177 | 0.0159 | 0.2670 | -0.0078 | 0.0105 | 0.4552 |
| rs76750172  | 13 | 28395297  | T | C | -0.0342 | 0.0455 | 0.4520 | 0.0093  | 0.0310 | 0.7656 |
| rs9549092   | 13 | 40754324  | C | T | -0.0153 | 0.0200 | 0.4450 | 0.0190  | 0.0114 | 0.0957 |
| rs4142110   | 13 | 42754522  | C | T | -0.0130 | 0.0151 | 0.3920 | 0.0222  | 0.0090 | 0.0142 |
| rs75276039  | 13 | 45495991  | G | A | 0.0645  | 0.0550 | 0.2410 | 0.0344  | 0.0247 | 0.1638 |
| rs9534448   | 13 | 47212961  | A | G | -0.0154 | 0.0176 | 0.3830 | -0.0421 | 0.0104 | 0.0001 |
| rs45604939  | 13 | 49775997  | G | A | 0.0549  | 0.0294 | 0.0622 | 0.0308  | 0.0176 | 0.0801 |
| rs61957204  | 13 | 74084684  | A | G | -0.0585 | 0.0295 | 0.0476 | 0.0226  | 0.0172 | 0.1885 |
| rs1539182   | 13 | 74840527  | T | C | -0.0348 | 0.0150 | 0.0203 | 0.0027  | 0.0086 | 0.7525 |
| rs9521492   | 13 | 110381691 | G | A | 0.0129  | 0.0161 | 0.4220 | -0.0180 | 0.0092 | 0.0508 |
| rs9577924   | 13 | 114545317 | G | A | 0.0421  | 0.0175 | 0.0158 | 0.0057  | 0.0118 | 0.6306 |
| rs8017377   | 14 | 24883887  | A | G | 0.0011  | 0.0154 | 0.9430 | -0.0059 | 0.0091 | 0.5164 |
| rs8015400   | 14 | 25930988  | A | C | 0.0176  | 0.0155 | 0.2580 | -0.0255 | 0.0094 | 0.0068 |
| rs33912345  | 14 | 60976537  | A | C | -0.0202 | 0.0165 | 0.2210 | 0.0100  | 0.0091 | 0.2748 |
| rs36215895  | 14 | 64676751  | T | C | -0.0156 | 0.0948 | 0.8690 | NA      | NA     | NA     |
| rs4902647   | 14 | 69254191  | T | C | 0.0042  | 0.0150 | 0.7790 | 0.0163  | 0.0089 | 0.0661 |
| rs8007859   | 14 | 69704553  | T | G | 0.0165  | 0.0154 | 0.2840 | 0.0055  | 0.0091 | 0.5472 |

|             |    |           |   |   |         |        |        |         |        |        |
|-------------|----|-----------|---|---|---------|--------|--------|---------|--------|--------|
| rs887506    | 14 | 74219367  | G | A | 0.0044  | 0.0160 | 0.7830 | 0.0059  | 0.0092 | 0.5241 |
| rs13379042  | 14 | 74250100  | C | T | 0.0021  | 0.0188 | 0.9120 | 0.0047  | 0.0100 | 0.6406 |
| rs175012    | 14 | 75455810  | C | A | -0.0251 | 0.0150 | 0.0940 | -0.0077 | 0.0089 | 0.3858 |
| rs11625365  | 14 | 77908588  | G | A | 0.0108  | 0.0150 | 0.4700 | -0.0070 | 0.0090 | 0.4349 |
| rs10146997  | 14 | 79945162  | G | A | 0.0069  | 0.0175 | 0.6940 | 0.0041  | 0.0108 | 0.7050 |
| rs77004437  | 14 | 92793206  | T | C | 0.0064  | 0.0305 | 0.8340 | 0.0157  | 0.0155 | 0.3128 |
| rs61992606  | 14 | 93943998  | A | G | 0.0019  | 0.0156 | 0.9020 | -0.0077 | 0.0094 | 0.4110 |
| rs112635299 | 14 | 94838142  | T | G | 0.0005  | 0.0534 | 0.9930 | NA      | NA     | NA     |
| rs1802710   | 14 | 101200645 | C | T | -0.0083 | 0.0160 | 0.6040 | 0.0013  | 0.0090 | 0.8858 |
| rs17747633  | 15 | 40916237  | G | A | -0.0122 | 0.0154 | 0.4310 | 0.0139  | 0.0090 | 0.1229 |
| rs7165861   | 15 | 43423327  | A | G | -0.0103 | 0.0161 | 0.5250 | -0.0073 | 0.0092 | 0.4241 |
| rs55707100  | 15 | 43820717  | T | C | -0.0636 | 0.1004 | 0.5260 | 0.0706  | 0.0270 | 0.0089 |
| rs10459592  | 15 | 51536141  | G | T | 0.0072  | 0.0152 | 0.6350 | 0.0165  | 0.0089 | 0.0650 |
| rs7178424   | 15 | 62380259  | T | C | 0.0030  | 0.0160 | 0.8510 | 0.0195  | 0.0089 | 0.0286 |
| rs633275    | 15 | 64895319  | G | T | -0.0064 | 0.0234 | 0.7840 | -0.0048 | 0.0135 | 0.7219 |
| rs266335    | 15 | 67344732  | A | G | -0.0097 | 0.0155 | 0.5310 | -0.0202 | 0.0094 | 0.0307 |
| rs2033784   | 15 | 67449660  | G | A | -0.0108 | 0.0164 | 0.5110 | -0.0002 | 0.0089 | 0.9821 |
| rs78049372  | 15 | 68429836  | T | C | 0.0283  | 0.0392 | 0.4700 | 0.0210  | 0.0213 | 0.3249 |
| rs5742915   | 15 | 74336633  | C | T | -0.0198 | 0.0152 | 0.1920 | 0.0092  | 0.0093 | 0.3227 |
| rs2930313   | 15 | 74609378  | G | A | -0.0295 | 0.0286 | 0.3030 | 0.0206  | 0.0158 | 0.1933 |
| rs2307449   | 15 | 89863928  | G | T | 0.0010  | 0.0150 | 0.9470 | -0.0012 | 0.0088 | 0.8918 |
| rs12900461  | 15 | 93552656  | T | C | -0.0167 | 0.0174 | 0.3390 | -0.0215 | 0.0120 | 0.0722 |
| rs12912439  | 15 | 95828705  | T | C | 0.0018  | 0.0178 | 0.9210 | -0.0063 | 0.0096 | 0.5085 |
| rs8027457   | 15 | 99204101  | C | T | 0.0028  | 0.0150 | 0.8540 | 0.0090  | 0.0088 | 0.3105 |
| rs2684789   | 15 | 99492045  | A | G | 0.0042  | 0.0150 | 0.7770 | -0.0074 | 0.0090 | 0.4069 |
| rs143076454 | 16 | 921179    | A | G | -0.1075 | 0.0646 | 0.0962 | -0.0054 | 0.0324 | 0.8671 |
| rs742036    | 16 | 960725    | A | G | 0.0189  | 0.0159 | 0.2350 | -0.0041 | 0.0095 | 0.6651 |
| rs4988483   | 16 | 1129010   | A | C | -0.0919 | 0.0556 | 0.0982 | NA      | NA     | NA     |
| rs60095937  | 16 | 1782964   | A | C | 0.1252  | 0.0650 | 0.0541 | 0.0169  | 0.0360 | 0.6399 |
| rs72761177  | 16 | 1833508   | A | G | 0.0242  | 0.0322 | 0.4510 | 0.0004  | 0.0157 | 0.9797 |
| rs344359    | 16 | 1838640   | C | T | -0.0190 | 0.0168 | 0.2570 | -0.0218 | 0.0120 | 0.0691 |
| rs111845910 | 16 | 1991014   | A | G | -0.0198 | 0.0260 | 0.4460 | -0.0182 | 0.0224 | 0.4172 |
| rs1369924   | 16 | 5924291   | C | A | -0.0211 | 0.0181 | 0.2430 | 0.0040  | 0.0116 | 0.7306 |
| rs9924441   | 16 | 9047198   | T | C | -0.0146 | 0.0189 | 0.4400 | 0.0093  | 0.0102 | 0.3660 |
| rs11646268  | 16 | 10498892  | C | T | 0.0024  | 0.0163 | 0.8830 | -0.0189 | 0.0101 | 0.0612 |
| rs6498697   | 16 | 17479794  | G | A | -0.0293 | 0.0156 | 0.0605 | -0.0016 | 0.0089 | 0.8576 |
| rs7197580   | 16 | 19278625  | A | G | -0.0019 | 0.0150 | 0.8970 | -0.0094 | 0.0090 | 0.2927 |
| rs12443881  | 16 | 28841777  | T | C | -0.0137 | 0.0152 | 0.3680 | -0.0190 | 0.0091 | 0.0373 |
| rs12447915  | 16 | 30089908  | T | C | -0.0081 | 0.0153 | 0.5960 | -0.0242 | 0.0092 | 0.0085 |
| rs11865038  | 16 | 31095171  | T | C | 0.0029  | 0.0153 | 0.8470 | 0.0112  | 0.0091 | 0.2172 |
| rs10521222  | 16 | 51158710  | T | C | -0.0370 | 0.0473 | 0.4350 | -0.0071 | 0.0211 | 0.7351 |
| rs9929277   | 16 | 56158718  | G | A | -0.0043 | 0.0150 | 0.7770 | -0.0127 | 0.0088 | 0.1501 |
| rs60762594  | 16 | 69098998  | C | T | 0.0123  | 0.0258 | 0.6330 | 0.0019  | 0.0150 | 0.8995 |
| rs62052820  | 16 | 69575238  | A | G | -0.0007 | 0.0183 | 0.9700 | 0.0178  | 0.0107 | 0.0949 |
| rs11859878  | 16 | 81515956  | T | C | 0.0018  | 0.0470 | 0.9700 | -0.0278 | 0.0179 | 0.1214 |
| rs4888156   | 16 | 81604256  | C | T | -0.0092 | 0.0170 | 0.5880 | -0.0064 | 0.0093 | 0.4903 |
| rs4889364   | 16 | 81719115  | A | G | 0.0127  | 0.0175 | 0.4680 | 0.0004  | 0.0096 | 0.9669 |
| rs66720010  | 16 | 83979322  | G | A | -0.0300 | 0.0151 | 0.0471 | 0.0056  | 0.0092 | 0.5425 |
| rs12453909  | 17 | 185338    | A | C | 0.0011  | 0.0200 | 0.9570 | -0.0256 | 0.0128 | 0.0456 |
| rs4790814   | 17 | 1622177   | A | G | 0.0119  | 0.0151 | 0.4300 | -0.0015 | 0.0109 | 0.8900 |
| rs35386490  | 17 | 7310006   | C | T | 0.0366  | 0.0213 | 0.0862 | NA      | NA     | NA     |
| rs727428    | 17 | 7537792   | C | T | -0.0260 | 0.0154 | 0.0908 | 0.0031  | 0.0090 | 0.7302 |
| rs2301652   | 17 | 15928584  | G | T | 0.0078  | 0.0151 | 0.6080 | -0.0127 | 0.0090 | 0.1584 |
| rs4925138   | 17 | 17992793  | G | T | -0.0110 | 0.0150 | 0.4650 | -0.0015 | 0.0087 | 0.8635 |
| rs1877031   | 17 | 37814080  | A | G | -0.0014 | 0.0161 | 0.9300 | -0.0097 | 0.0094 | 0.3019 |
| rs8070454   | 17 | 38160754  | T | C | 0.0261  | 0.0153 | 0.0874 | -0.0098 | 0.0089 | 0.2660 |
| rs8068844   | 17 | 40571284  | C | T | -0.0112 | 0.0159 | 0.4820 | -0.0246 | 0.0094 | 0.0090 |
| rs199448    | 17 | 44809001  | G | A | 0.0224  | 0.0270 | 0.4060 | 0.0002  | 0.0104 | 0.9847 |
| rs8070132   | 17 | 57790206  | C | T | 0.0422  | 0.0208 | 0.0421 | 0.0039  | 0.0122 | 0.7496 |
| rs2070776   | 17 | 62007498  | G | A | -0.0109 | 0.0152 | 0.4730 | 0.0158  | 0.0097 | 0.1044 |
| rs76708468  | 17 | 62206299  | C | T | -0.0362 | 0.0551 | 0.5110 | NA      | NA     | NA     |
| rs1801689   | 17 | 64210580  | C | A | -0.1408 | 0.0774 | 0.0688 | 0.0293  | 0.0256 | 0.2528 |
| rs77542162  | 17 | 67081278  | G | A | -0.0561 | 0.0959 | 0.5590 | NA      | NA     | NA     |
| rs6501601   | 17 | 71124903  | A | G | -0.0240 | 0.0154 | 0.1210 | 0.0117  | 0.0091 | 0.1962 |

|            |    |          |   |   |         |        |        |         |        |        |
|------------|----|----------|---|---|---------|--------|--------|---------|--------|--------|
| rs1135688  | 17 | 73827205 | C | T | -0.0346 | 0.0177 | 0.0506 | 0.0106  | 0.0099 | 0.2822 |
| rs2040176  | 18 | 892467   | T | C | 0.0104  | 0.0245 | 0.6700 | -0.0159 | 0.0128 | 0.2118 |
| rs2198557  | 18 | 1620210  | G | T | 0.0020  | 0.0171 | 0.9060 | -0.0118 | 0.0097 | 0.2204 |
| rs4468717  | 18 | 3457606  | T | C | 0.0228  | 0.0219 | 0.2970 | -0.0057 | 0.0170 | 0.7361 |
| rs34233878 | 18 | 42594280 | C | T | -0.0268 | 0.0252 | 0.2870 | -0.0383 | 0.0151 | 0.0112 |
| rs17487484 | 18 | 50723283 | G | T | 0.0172  | 0.0151 | 0.2540 | 0.0082  | 0.0090 | 0.3630 |
| rs8099014  | 18 | 56109859 | A | C | -0.0170 | 0.0168 | 0.3110 | 0.0220  | 0.0100 | 0.0281 |
| rs585187   | 18 | 58177124 | T | G | -0.0069 | 0.0150 | 0.6470 | 0.0115  | 0.0088 | 0.1922 |
| rs12454712 | 18 | 60845884 | C | T | -0.0131 | 0.0151 | 0.3830 | 0.0020  | 0.0095 | 0.8338 |
| rs2717128  | 18 | 74987632 | G | A | -0.0045 | 0.0224 | 0.8390 | -0.0182 | 0.0130 | 0.1635 |
| rs7227840  | 18 | 75164995 | T | C | 0.0014  | 0.0157 | 0.9310 | 0.0013  | 0.0094 | 0.8899 |
| rs632616   | 19 | 4976335  | T | C | 0.0179  | 0.0151 | 0.2350 | -0.0031 | 0.0095 | 0.7445 |
| rs7248104  | 19 | 7224431  | A | G | -0.0188 | 0.0151 | 0.2130 | 0.0079  | 0.0090 | 0.3801 |
| rs8105174  | 19 | 10347032 | T | C | -0.0466 | 0.0214 | 0.0293 | -0.0082 | 0.0137 | 0.5475 |
| rs281437   | 19 | 10397238 | T | C | -0.0185 | 0.0174 | 0.2880 | -0.0004 | 0.0109 | 0.9707 |
| rs12983573 | 19 | 10701833 | C | T | 0.0128  | 0.0164 | 0.4370 | 0.0006  | 0.0095 | 0.9496 |
| rs4804528  | 19 | 10886206 | T | G | -0.0239 | 0.0156 | 0.1250 | 0.0063  | 0.0092 | 0.4930 |
| rs737337   | 19 | 11347493 | C | T | 0.0166  | 0.0262 | 0.5280 | -0.0204 | 0.0159 | 0.1988 |
| rs7258465  | 19 | 18533642 | C | T | 0.0237  | 0.0154 | 0.1240 | 0.0008  | 0.0117 | 0.9453 |
| rs6510033  | 19 | 30710785 | G | A | -0.0302 | 0.0182 | 0.0963 | 0.0198  | 0.0098 | 0.0428 |
| rs7599     | 19 | 36038390 | G | A | 0.0468  | 0.0161 | 0.0035 | -0.0044 | 0.0099 | 0.6546 |
| rs3810291  | 19 | 47569003 | A | G | 0.0160  | 0.0155 | 0.3020 | -0.0181 | 0.0099 | 0.0685 |
| rs10426201 | 19 | 48384749 | A | G | -0.0031 | 0.0195 | 0.8750 | -0.0086 | 0.0120 | 0.4722 |
| rs2287922  | 19 | 49232226 | A | G | -0.0053 | 0.0152 | 0.7280 | -0.0106 | 0.0090 | 0.2383 |
| rs12975366 | 19 | 54759361 | C | T | -0.0095 | 0.0156 | 0.5410 | 0.0093  | 0.0109 | 0.3974 |
| rs16988490 | 20 | 3335431  | C | T | 0.0199  | 0.0223 | 0.3720 | -0.0094 | 0.0106 | 0.3737 |
| rs34950733 | 20 | 20080775 | G | A | -0.0019 | 0.0156 | 0.9030 | 0.0209  | 0.0101 | 0.0394 |
| rs6035613  | 20 | 20356386 | T | C | 0.0360  | 0.0168 | 0.0319 | -0.0056 | 0.0118 | 0.6329 |
| rs6082354  | 20 | 21217976 | C | A | 0.0016  | 0.0166 | 0.9240 | -0.0045 | 0.0095 | 0.6357 |
| rs6060043  | 20 | 33364584 | T | C | 0.0290  | 0.0236 | 0.2190 | 0.0062  | 0.0115 | 0.5923 |
| rs1744769  | 20 | 35769592 | C | T | 0.0312  | 0.0163 | 0.0550 | -0.0149 | 0.0113 | 0.1851 |
| rs2207132  | 20 | 39142516 | A | G | -0.0351 | 0.0307 | 0.2520 | -0.0045 | 0.0252 | 0.8579 |
| rs1997833  | 20 | 39690342 | C | T | 0.0013  | 0.0175 | 0.9420 | 0.0291  | 0.0096 | 0.0024 |
| rs17265513 | 20 | 39832628 | C | T | 0.0136  | 0.0166 | 0.4150 | 0.0237  | 0.0113 | 0.0359 |
| rs56344540 | 20 | 49194444 | T | C | 0.0316  | 0.0290 | 0.2760 | 0.0316  | 0.0167 | 0.0582 |
| rs61652170 | 20 | 54813718 | A | C | -0.0114 | 0.0189 | 0.5480 | -0.0157 | 0.0112 | 0.1610 |
| rs34340379 | 20 | 54850686 | G | T | -0.0262 | 0.0181 | 0.1480 | 0.0055  | 0.0106 | 0.6037 |
| rs76602912 | 20 | 57459868 | C | T | 0.0407  | 0.0498 | 0.4130 | 0.0223  | 0.0293 | 0.4452 |
| rs2738787  | 20 | 62328375 | G | A | 0.0541  | 0.0305 | 0.0758 | -0.0207 | 0.0169 | 0.2195 |
| rs8121509  | 20 | 62712053 | C | T | -0.0128 | 0.0151 | 0.3940 | -0.0145 | 0.0106 | 0.1732 |
| rs2254446  | 21 | 37378153 | C | T | 0.0265  | 0.0167 | 0.1130 | 0.0045  | 0.0102 | 0.6585 |
| rs11088472 | 21 | 40699376 | C | A | -0.0237 | 0.0160 | 0.1380 | -0.0269 | 0.0089 | 0.0026 |
| rs469390   | 21 | 42817930 | A | G | -0.0282 | 0.0150 | 0.0602 | -0.0125 | 0.0090 | 0.1661 |
| rs1006771  | 22 | 24314006 | T | G | 0.0027  | 0.0164 | 0.8710 | 0.0049  | 0.0095 | 0.6077 |
| rs3178915  | 22 | 29453027 | G | A | 0.0182  | 0.0151 | 0.2270 | 0.0024  | 0.0087 | 0.7830 |
| rs16989528 | 22 | 32217539 | T | C | -0.0311 | 0.0288 | 0.2810 | -0.0400 | 0.0258 | 0.1205 |
| rs6000004  | 22 | 36180535 | G | A | -0.0139 | 0.0246 | 0.5710 | -0.0181 | 0.0128 | 0.1596 |
| rs138703   | 22 | 39132748 | A | G | -0.0070 | 0.0157 | 0.6530 | 0.0063  | 0.0092 | 0.4960 |
| rs202659   | 22 | 41811620 | C | T | -0.0220 | 0.0175 | 0.2090 | -0.0319 | 0.0106 | 0.0026 |

For the FinnGen study, estimates of proxy SNPs ( $r^2 > 0.8$ ) were used for two SNPs (rs13184788 and rs2450136). For the study of Choquet et al 2021, estimates of proxy SNPs ( $r^2 > 0.8$ ) were used for three SNPs (rs143076454, rs111845910 and rs76602912).

**Abbreviations:** EA, effect allele; MAF, minor allele frequency; OA other allele; SNP, single nucleotide polymorphism; VR, variance explained.
